1 **Regulation of stem cell identity by miR-200a during spinal cord regeneration**

2

3 Sarah E. Walker<sup>3,α</sup>, Keith Z. Sabin<sup>1,3,α</sup>, Micah D. Gearhart<sup>2</sup>, Kenta Yamamoto<sup>2</sup> and Karen  
4 Echeverri<sup>3,\*</sup>

5

6 1. Current Address: Stowers Institute for Medical Research, Kansas City, MO, USA

7 2. University of Minnesota, Minneapolis, MN, USA

8 3. Eugene Bell Center for Regenerative Biology and Tissue Engineering, Marine  
9 Biological Laboratory, Woods Hole, MA, USA

10

11 <sup>α</sup>These authors contributed equally to the work.

12 \*Corresponding author: kecheverri@mbi.edu

13

14 **Key words:** axolotl, spinal cord, stem cell, mesoderm, regeneration

15

16 **Summary Statement:** After spinal cord injury, miR-200 fine-tunes expression levels  
17 *brachyury* and *β-catenin* to direct spinal cord stem into cells of the mesodermal or  
18 ectodermal lineage.

19

20 **Abstract**

21 Axolotls are an important model organism for multiple types of regeneration, including  
22 functional spinal cord regeneration. Remarkably, axolotls can repair their spinal cord  
23 after a small lesion injury and can also regenerate their entire tail following amputation.  
24 Several classical signaling pathways that are used during development are reactivated  
25 during regeneration, but how this is regulated remains a mystery. We have previously  
26 identified miR-200a as a key factor that promotes successful spinal cord regeneration.  
27 Here, using RNA-seq analysis, we discovered that the inhibition of miR-200a results in  
28 an upregulation of the classical mesodermal marker *brachyury* in spinal cord cells after  
29 injury. However, these cells still express the neural stem cell marker *sox2*. *In vivo*  
30 lineage tracing allowed us to determine that these cells can give rise to cells of both the  
31 neural and mesoderm lineage. Additionally, we found that miR-200a can directly  
32 regulate *brachyury* via a seed sequence in the 3'UTR of the gene. Our data indicate that  
33 miR-200a represses mesodermal cell fate after a small lesion injury in the spinal cord  
34 when only glial cells and neurons need to be replaced.

35

## 36 **Introduction**

37           Regeneration has been observed throughout the plant and animal kingdoms for  
38 many years (Sanchez Alvarado and Tsonis, 2006). Among vertebrates, the Mexican  
39 axolotl salamander has the remarkable ability to faithfully regenerate its spinal cord after  
40 injury. This process has been most commonly studied in the context of tail amputation  
41 (McHedlishvili et al., 2012, Monaghan et al., 2007, Piatt, 1955, Rodrigo Albors et al.,  
42 2015, Zhang et al., 2000, Zhang et al., 2002a), but the axolotl spinal cord also  
43 regenerates after a more targeted transection injury (Butler and Ward, 1965, Butler and  
44 Ward, 1967, Clarke et al., 1988, O'Hara et al., 1992, Zukor et al., 2011). These lines of  
45 investigation have identified a population of Sox2<sup>+</sup>/GFAP<sup>+</sup> glial cells that function as *bona*  
46 *fide* neural stem cells (NSCs) in the axolotl spinal cord (Echeverri and Tanaka, 2002, Fei  
47 et al., 2016, Fei et al., 2014a, McHedlishvili et al., 2012, Rodrigo Albors et al., 2015).  
48 These Sox2<sup>+</sup>/GFAP<sup>+</sup> NSCs proliferate after injury and differentiate into new glia and  
49 neurons (Echeverri and Tanaka, 2002, McHedlishvili et al., 2012, Rodrigo Albors et al.,  
50 2015). Inhibition of NSC function by CRISPR/Cas9-mediated knockout of Sox2 results in  
51 deficient regenerative outgrowth of the spinal cord after tail amputation (Fei et al., 2016,  
52 Fei et al., 2014a).

53           Molecular signals required for the NSC response to injury have been identified  
54 after both tail amputation and spinal cord transection. Sonic hedgehog, Wnt/PCP, and  
55 Fgf signaling are indispensable for the pro-regenerative NSC response to tail amputation  
56 (Rodrigo Albors et al., 2015, Schnapp et al., 2005, Zhang et al., 2000, Zhang et al.,  
57 2002a). During spinal cord regeneration after transection, the transcriptional complex  
58 AP-1<sup>cFos/JunB</sup> and MAP kinase signaling are critical regulators of the NSC response to  
59 injury (Sabin et al., 2015a, Sabin et al., 2019). Additionally, microRNA (miRNA) signaling  
60 is important to fine-tune the NSC response to injury after both tail amputation and spinal  
61 cord transection (Diaz Quiroz et al., 2014, Gearhart et al., 2015, Lepp and Carlone,  
62 2014, Sehm et al., 2009).

63           We previously demonstrated that miR-200a is an important regulator of the glial  
64 cell response after spinal cord transection (Sabin et al., 2019). The function of miR-200a  
65 has been most extensively studied during neurodevelopment and epithelial-to-  
66 mesenchymal transition (EMT) (Trumbach and Prakash, 2015, Zaravinos, 2015). miR-  
67 200a functions to inhibit EMT by directly repressing the expression of the transcription  
68 factor *β-catenin* (Su et al., 2012, Zaravinos, 2015). This leads to maintained epithelial

69 polarity and decreased Wnt signaling. During neurodevelopment, miR-200 family  
70 members regulate many processes: neuronal survival (Karres et al., 2007),  
71 neuroepithelial progenitor proliferation, NSC identity and neuroblast transition (Morante  
72 et al., 2013), neural progenitor identity and cell cycle dynamics (Peng et al., 2012), as  
73 well as fine tunes signaling networks necessary for neurogenesis (Choi et al., 2008,  
74 Vallejo et al., 2011) and gliogenesis (Buller et al., 2012).

75 Early experiments aimed at determining the potential of GFAP<sup>+</sup>/Sox2<sup>+</sup> NSCs  
76 prospectively labeled these cells with the Glial fibrillary acidic protein (GFAP) promoter  
77 driving GFP expression and used live *in vivo* fluorescence imaging to follow GFP<sup>+</sup> glial  
78 cells after tail amputation. Most GFP<sup>+</sup> NSCs gave rise to new neurons and glia but a  
79 small proportion of labeled cells left the spinal cord and contributed to muscle and  
80 cartilage within the regenerated tail (Echeverri and Tanaka, 2002). Similar experiments  
81 using grafting of GFP<sup>+</sup> spinal cords into non-transgenic animals further confirmed that  
82 spinal cord cells exited the spinal cord and contributed to cells of other lineages during  
83 tail regeneration (McHedlishvili et al., 2007).

84 Recent reports have identified a population of progenitors, called  
85 neuromesodermal progenitors (NMPs), which reside in the posterior of developing  
86 vertebrate embryos (Henrique et al., 2015, Kimelman, 2016b). NMPs are competent to  
87 contribute to both the mesoderm and spinal cord during embryonic development  
88 (Garriock et al., 2015, Henrique et al., 2015, Tzouanacou et al., 2009). Extensive genetic  
89 and biochemical analysis determined that NMPs can be defined by the co-expression of  
90 low levels of the transcription factors Brachyury and Sox2 (Gouti et al., 2017, Koch et al.,  
91 2017a, Turner et al., 2014a, Wymeersch et al., 2016). Also, the relative level of Fgf and  
92 Wnt signaling activity regulate NMP cell fate decisions (i.e. differentiation into  
93 mesodermal progenitors or neural progenitors) (Bouldin et al., 2015, Garriock et al.,  
94 2015, Goto et al., 2017, Gouti et al., 2017, Gouti et al., 2015, Martin, 2016, Martin and  
95 Kimelman, 2008, Turner et al., 2014a). Both Fgf and Wnt signaling are important  
96 regulators of the NSC response to tail amputation, as inhibition of either Wnt or Fgf  
97 blocks tail regeneration (Makanae et al., 2016, Ponomareva et al., 2015, Zhang et al.,  
98 2000, Albors et al., 2015). Although the role of individual Fgf ligands in spinal cord  
99 regeneration is relatively unknown, the expression of *wnt5* has been elegantly shown to  
100 be essential for orientated cell division and outgrowth of the spinal cord during whole tail  
101 regeneration (Albors et al., 2015). However, the activity of these pathways after spinal  
102 cord transection has not been well characterized.

103 In this study we identify a role for miR-200a in stabilizing the NSC identity after  
104 spinal cord transection in axolotl, by repressing expression of the mesodermal marker  
105 *brachyury*. Furthermore, we uncovered other genes in the miR-200 pathway and provide  
106 evidence that depending on the injury context, such as spinal cord lesion repair or spinal  
107 cord outgrowth during tail regeneration, that miR-200a plays an important role in  
108 determining the identity of NSCs in the spinal cord during the regenerative process.

109

## 110 **Results**

111

### 112 **Transcriptional profiling identifies conserved miR-200a targets in homeostatic** 113 **versus regenerating spinal cords**

114 We previously identified miR-200a as a key microRNA (miRNA) that inhibits *c-jun*  
115 expression in neural stem cells in the spinal cord after injury, and hence plays an  
116 important role in preventing reactive gliosis and promoting a pro-regenerative  
117 response (Sabin et al., 2019). Additional RNA sequencing (RNA-seq) on uninjured and 4  
118 days post injury spinal cord tissue electroporated with a control or specific, antisense  
119 miR-200a inhibitor identified other targets of miR-200a in axolotl spinal cord (**Fig. 1A,**  
120 **Table S1**). During normal regeneration at 4 days post injury there were 1,163 genes that  
121 are differentially expressed (Log2 fold change  $\geq 2$ -fold,  $p \leq 0.05$ ) compared to uninjured  
122 spinal cords. Inhibition of miR-200a in the uninjured spinal cord resulted in 6,235  
123 transcripts with a greater than 2-fold differential expression compared to control  
124 uninjured spinal cords. Interestingly, of the 6,235 differentially expressed genes, only  
125 2,760 were up-regulated (**Fig. 1A, Fig. S1, Table S1**). We used GOrilla analysis to  
126 identify gene ontology (GO) terms for the subset of genes that were significantly up-  
127 regulated after miR-200a inhibition. GO terms involved with translation, RNA  
128 metabolism, peptide metabolism, and translation initiation were significantly enriched in  
129 this gene set ( $p \leq 10^{-24}$ ) (**Fig. S1**). Interestingly, the 3,475 genes that were significantly  
130 down-regulated in uninjured spinal cords after miR-200a inhibition were enriched for GO  
131 terms involved with organismal development, developmental process, cellular  
132 differentiation, and signaling ( $p \leq 10^{-22}$ ) (**Fig. S1**).

133 Analysis of differentially expressed genes at 4 days post injury after miR-200a  
134 inhibition identified a total of 1,007 genes that were differentially expressed compared to  
135 control spinal cords. This is a much smaller gene set and suggests that there is a higher  
136 specificity to genes affected by miR-200a during spinal cord regeneration. A total of 797

137 genes were up-regulated and 210 genes were down-regulated after miR-200a inhibition  
138 (**Fig. S1**). Genes that were up-regulated were enriched for GO terms involved with  
139 nucleic acid metabolism, specifically RNA metabolism, and protein localization ( $p \leq 10^{-6}$ )  
140 (**Fig. S1**). Interestingly, the top GO terms enriched in down-regulated genes were  
141 involved with nervous system processes, specifically synaptic signaling and chemical  
142 synaptic signaling, as well as nervous system development ( $p \leq 10^{-6}$ ).

143 Taking a more targeted gene-level approach, we generated a heat map of the 30  
144 most significantly up-regulated and down-regulated genes in all four conditions (**Fig.1C**).  
145 Consistent with the GO analysis, genes involved in RNA processing, nucleic acid  
146 metabolism, and protein targeting were among the most up-regulated genes in our data  
147 set (*tdrd9*, *acap1*, *eme1*, *zfp324b*). Similarly, genes involved with neurotransmitter  
148 transport, neuronal polarization, neurotrophin signaling, and neuronal differentiation  
149 were among the most down-regulated genes (*slc6a6*, *brsk1*, *slc6a14*, *arhgap8*,  
150 *neurog1*). Surprisingly, the transcription factor *brachyury* (*T*) was among one of the most  
151 up-regulated genes at 4 days post injury in response to miR-200a inhibition (**Fig.1C**). In  
152 4 days post injury controls, *brachyury* was not up-regulated in response to injury, the  
153 RNA seq transcripts per million (TPM) values on Control uninjured were 0.782 TPM,  
154 versus 4 dpi post injury 0.92 TPM, show no significant increase (**Table S1**). However,  
155 inhibition of miR-200a in uninjured spinal cords led to a 2-fold increase in *brachyury*  
156 expression (2.236 TPM), while the combination of miR-200a inhibition during injury led to  
157 a highly significant 7-fold increase in its mRNA levels (5.8 TPM, **Table S1**).

158 We used quantitative RT-PCR (qRT-PCR) to verify genes of interest revealed by  
159 RNA-seq, this approach confirmed that *brachyury* is detectable at very low levels in  
160 uninjured and control 4 days post injury spinal cords but is significantly up-regulated  
161 after miR-200a inhibition in 4 days post injury spinal cords (**Fig.1D**). This is an intriguing  
162 finding as *brachyury* is considered a classical marker of mesodermal tissue and was  
163 originally thought to be absent from in the nervous system. However, more recent  
164 research has identified a bipotent cell population in development, in which some spinal  
165 cord neural progenitor cells are developmentally derived from Sox2<sup>+</sup>/Brachyury<sup>+</sup>  
166 neuromesodermal progenitors (NMPs) (Garriock et al., 2015, Tzouanacou et al., 2009,  
167 Wymeersch et al., 2016). In the axolotl, the *bona fide* stem cells that line the central  
168 canal are identified by the expression of the glial cell marker GFAP and the neural stem  
169 cell marker Sox2. These GFAP<sup>+</sup>/Sox2<sup>+</sup> cells respond to the injury, divide, migrate and  
170 repair a lesion in the spinal cord, or regenerate lost cells and tissues in the context of

171 whole tail regeneration (Sabin et al., 2015a, Fei et al., 2014b, Echeverri and Tanaka,  
172 2002, Echeverri and Tanaka, 2003a, McHedlishvili et al., 2007, McHedlishvili et al.,  
173 2012). Given that NMPs and axolotl glial cells both express Sox2 and that *sox2* is a miR-  
174 200a target during mouse brain development (Peng et al., 2012), we assayed *sox2*  
175 transcript abundance. Interestingly, while *sox2* is slightly up-regulated in control 4 days  
176 post injury compared to uninjured spinal cords, *sox2* expression did not increase in miR-  
177 200a inhibitor treated spinal cords. Instead, the *sox2* transcript abundance remains near  
178 uninjured homeostatic levels (**Fig.1D**). This observation suggests that axolotl *sox2* is not  
179 a direct target of miR-200a as it is in mammals (Pandey et al., 2015, Peng et al., 2012,  
180 Wang et al., 2013).

181 To identify the cells that express *brachyury* in the 4 days post injury spinal cord  
182 after miR-200a inhibition, *in situ* hybridization was used. *In situ* hybridization determined  
183 that cells lining the central canal are *brachyury*<sup>+</sup> after miR-200a inhibition (**Fig.1Evi**), and  
184 importantly, this is the same population of cells that express *sox2* (**Fig.1Evi, viii**) .  
185 Collectively, this data indicates that miR-200a inhibition leads to increased *brachyury*  
186 expression in stem cells in the axolotl spinal cord. Although these progenitor cells have  
187 been traditionally thought of as NSCs due to their expression of the classical NSC  
188 marker *sox2*, they also express low levels of the mesodermal marker *brachyury*  
189 (**Fig.1D**), suggesting that they are in fact a population of bipotent stem cells and may in  
190 fact have broader differentiation potential.

191

## 192 **Inhibition of miR-200a leads to changes in cell fate after spinal cord injury**

193 To determine if miR-200a inhibition and subsequent upregulation of the mesodermal  
194 marker *brachyury* leads to changes in the number of NSC in the regenerating spinal  
195 cord, we quantified the number of Sox2<sup>+</sup> cells in control versus inhibitor treated animals  
196 (**Fig.2A, B**). Previous work has shown that after spinal cord injury the cells that are  
197 activated to partake in the regeneration process lie within 500µm of the injury site.  
198 However, we detected no significant difference in the total number of Sox2<sup>+</sup> cells 500µm  
199 rostral or caudal of the injury site (**Fig.2A, B**). During the normal regenerative process in  
200 the spinal cord, the Sox2<sup>+</sup> stem cells will replenish the GFAP<sup>+</sup> cell population and  
201 differentiate into new neurons (Albors et al., 2015, Echeverri and Tanaka, 2002,  
202 Echeverri and Tanaka, 2003a, McHedlishvili et al., 2007, McHedlishvili et al., 2012). To  
203 determine if the number of newborn neurons is affected by miR-200a inhibition we  
204 quantified the number of NeuN and EDU<sup>+</sup> cells 500µm rostral and caudal to the injury

205 site. We found that overall, significantly fewer NeuN<sup>+</sup>/EdU<sup>+</sup> cells were found in the miR-  
206 200a inhibitor animals (**Fig. 2C, D**). Collectively, these data demonstrated that the total  
207 number of the Sox2<sup>+</sup> spinal cord stem cells is relatively the same in control versus miR-  
208 200a inhibited animals, but less NeuN<sup>+</sup> cells are found in the inhibitor treated animals.  
209 These findings suggest that either more cells remain in a progenitor-like state, or the  
210 expression of *brachyury* in the miR-200a inhibitor treated animals changes the fate of  
211 the cells. To address this question, we used *in vivo* cell tracking to determine the fate of  
212 these cells during regeneration of the lesioned spinal cord. We have previously tracked  
213 the fate of GFAP<sup>+</sup> spinal cord stem cells during regeneration of the lesioned spinal cord  
214 and found that these cells proliferate and migrate to replace the portion of injured neural  
215 tube, and that this is a bidirectional process (Sabin et al., 2015a). The same technique  
216 was used in these studies, the axolotl GFAP promoter driving expression of a  
217 fluorescent protein was injected into the lumen of the spinal cord, the animals were  
218 electroporated to label small groups of cells. The miR-200a inhibitor was injected into  
219 animals with fluorescently labelled cells and then the spinal cord ablation was performed  
220 (Sabin et al., 2019). The animals were imaged every 3-days over a two-week time  
221 period. In the control labelled animals, we found the cells behaved as we had previously  
222 described, the labeled cells proliferated and partook in repair of the neural tube,  
223 replenished the endogenous stem cell population, and differentiated to replace lost  
224 neurons (**Fig.3 A-D**), consistent with our previous work (Sabin et al., 2015). In contrast,  
225 in the miR-200a inhibitor treated animals although the cells proliferated and partook in  
226 repair of the lesioned spinal cord, we also discovered that the cells exited from the spinal  
227 cord and differentiated into muscle cells. The labelled cells which started in the spinal  
228 cord were always found in the muscle layer adjacent or directly above the spinal cord  
229 (**Fig.3I, J**). In all miR-200a inhibitor treated animals we observed at least 1 muscle fiber  
230 being formed in all animals (n=25), although in some animal's multiple fibers were seen.  
231 Additionally, in inhibitor and control animals' some cells differentiated into neurons and  
232 remained within the neural tube to give rise to new glial cells (data not shown). This data  
233 suggests that miR-200a represses *brachyury* in *sox2*<sup>+</sup> spinal cord stem cells, maintaining  
234 the cells in neural primed state. Inhibition of miR-200a in these cells results in the co-  
235 expression of neural (*sox2*) and mesoderm (*brachyury*) markers, converting the cells into  
236 a bipotent progenitor population capable of making both neural and mesodermal cells.

237

238 **Molecular regulation of progenitor cells by miR-200a**

239 Our data strongly indicate that inhibition of miR-200a leads to the expression of  
240 *brachyury* in stem cells within the axolotl spinal cord (**Fig. 1D,**). However, the signaling  
241 pathway(s) upstream of *brachyury* expression were not known. As a first step we first  
242 tested whether miR-200a could directly repress *brachyury* expression. The axolotl  
243 *brachyury* 3' untranslated region (UTR) contains three miR-200a seed sequences, this  
244 indicates that miR-200a could directly regulate *brachyury* expression. Consistent with  
245 this hypothesis, co-transfection of B35 neural cells with a *brachyury* 3' UTR luciferase  
246 reporter and miR-200a mimic led to decreased luciferase activity compared to the  
247 control mimic (**Fig. S2A**). This finding confirmed that miR-200a directly represses  
248 *brachyury* expression in axolotl spinal cord stem cells in homeostatic conditions and  
249 during normal regeneration.

250 During normal spinal cord regeneration in the context of a tail amputation model  
251 it has been found that *wnt* genes are re-expressed in the caudal 500 $\mu$ m of the  
252 outgrowing spinal cord and are necessary for this outgrowth (Albors et al., 2015). Further  
253 studies have shown that inhibition of all Wnt or Fgf signaling after tail amputation  
254 abolished regenerative outgrowth, suggesting both are necessary for spinal cord and tail  
255 regeneration (Ponomareva et al., 2015). As both Fgf and Wnt signaling regulate cell fate  
256 decisions of *brachyury*<sup>+</sup>/*sox2*<sup>+</sup> NMPs during development, we first tested whether Fgf  
257 signaling could be affected by miR-200a inhibition during regeneration. We assayed for  
258 expression of *fgf8* and *fgf10* by qRT-PCR on isolated spinal cord tissue. *Fgf8* expression  
259 was slightly down-regulated at 4 days post injury after miR-200a inhibition compared to  
260 uninjured spinal cords (**Fig.4A**), while *fgf10* expression was significantly up-regulated  
261 after miR-200a inhibition in 4 days post injury spinal cords compared to controls  
262 (**Fig.4A**). This finding is consistent with the idea that miR-200a inhibition could lead to an  
263 increase in *fgf* ligand expression in regenerating spinal cords. However, given that Wnt  
264 signaling directly regulates *Brachyury* expression (Arnold et al., 2000, Yamaguchi et al.,  
265 1999) and NMP cell fate decisions (Bouldin et al., 2015, Garriock et al., 2015, Martin,  
266 2016, Martin and Kimelman, 2008), we wanted to further examine the role of Wnt  
267 signaling.

268 The expression levels of *wnt3a*, *wnt5a*, *wnt8a* were quantified using qRT-PCR  
269 (**Fig. 4B**). Both *wnt3a* and *wnt8* transcript levels were not significantly altered in the  
270 inhibitor treated animals compared to controls. However, we did detect a significant  
271 difference in *wnt5a* levels. In 4 day post injury controls, *wnt5a* was up-regulated after  
272 injury, although this change in expression was not found in the miR-200a inhibitor



273 treated animals. To further verify the qRT-PCR results for *fgf* and *wnt* genes we  
274 performed fluorescent *in situs* for *fgf10* and *wnt5a* in control and miR-200a inhibitor  
275 treated regenerating animals. This confirmed that indeed *fgf10* transcript levels are up-  
276 regulated in cells within the spinal cord in comparison to the control regenerating  
277 animals (**Fig.4C, D**). Additionally, *wnt5a* transcript levels were down-regulated in cells  
278 within the spinal cord in comparison to controls (**Fig.4C, D**). Although here we see only  
279 changes in *wnt5a* expression, a Wnt which is known to play an important role in  
280 regeneration (Albors et al., 2015), there are many additional Wnt ligands, therefore Wnt  
281 signaling activity could still be affected by miR-200a inhibition. To establish a baseline  
282 for Wnt signaling activity after spinal cord injury we assayed *lef1* expression, which is a  
283 direct transcriptional target downstream of Wnt signaling (Filali et al., 2002). *Lef1*  
284 expression was significantly up-regulated in control 4 days post injury compared to  
285 uninjured spinal cords (**Fig. S3A**), indicating a potential increase in Wnt signaling after  
286 injury. Remarkably, *lef1* expression was significantly up-regulated even further after miR-  
287 200a inhibition in 4 days post injury compared to control regenerating spinal cords (**Fig.**  
288 **S3A**). Collectively, these data indicate that miR-200a inhibition could result in increased  
289 Wnt signaling, potentially independent of changes in *wnt* ligand expression.

290

### 291 **miR-200a modulates Wnt signaling activity by directly targeting $\beta$ -catenin**

292 While miR-200a inhibition could lead to increased Wnt signaling, it was not clear  
293 how this was occurring. During tumor progression, miR-200a inhibits the epithelial-to -  
294 mesenchymal transition subsequently blocking tumor cell metastasis (Su et al., 2012,  
295 Zaravinos, 2015). This is partially achieved through the direct repression of  $\beta$ -*catenin* by  
296 miR-200a, resulting in decreased Wnt signaling (Su et al., 2012). We did not observe a  
297 significant up-regulation of specific *wnt* ligand expression after miR-200a inhibition in the  
298 spinal cord cells (**Fig. 4B**). However, as determined by *lef1* expression, miR-200a  
299 inhibition could lead to increased Wnt signaling (**Fig. S3A**). Therefore, we hypothesized  
300 that miR-200a might regulate Wnt signaling by targeting  $\beta$ -*catenin*. To test our  
301 hypothesis, we first assayed for changes in  $\beta$ -*catenin* transcript abundance (*ctnnb1*).  
302 qRT-PCR analysis confirmed that after injury in control 4 days post injury spinal cords,  
303 there is an increase in *ctnnb1* abundance compared to uninjured spinal cords, similar to  
304 what we observed for *lef1* (**Fig. S3A**). There is a slight increase of *ctnnb1* transcript  
305 levels after miR-200a inhibition compared to control 4 days post injury spinal cords (**Fig.**  
306 **S3A**), indicating  $\beta$ -*catenin* could be a direct target of miR-200a in axolotl.

307 To determine whether miR-200a could target axolotl *β-catenin*, we cloned the  
308 *ctnnb1* 3' UTR and identified two miR-200a seed sequences. We subcloned the *ctnnb1*  
309 3' UTR into a luciferase reporter and co-transfected cells with a control mimic or miR-  
310 200a specific mimic. There was decreased luciferase activity in miR-200a mimic  
311 transfected cells compared to control, suggesting that miR-200a could regulate *β-catenin*  
312 expression (**Fig. S3B**). To confirm that the decrease in luciferase activity is due to direct  
313 regulation by miR-200a, we mutated both seed sequences in the *ctnnb1* 3' UTR and  
314 repeated the luciferase experiments. Mutation of the miR-200a seed sequences  
315 completely alleviated the repression, confirming that axolotl *β-catenin* is a direct target of  
316 miR-200a, similar to mammals (**Fig. S3B**).

317 Taken together, these data are consistent with the idea that miR-200a could  
318 modulate Wnt signaling through the direct regulation of *β-catenin* transcript levels.  
319 Inhibition of miR-200a leads to increased *lef1* expression, which is indicative of  
320 increased Wnt signaling. Increased levels of Wnt signaling may contribute to the  
321 increased *brachyury* expression and changes in *fgf10* levels in axolotl stem cells after  
322 spinal cord lesion.

323

### 324 **The role of spinal cord stem cells in spinal cord injury versus tail regeneration**

325 We have shown that when a lesion occurs in the axolotl spinal cord the glial cells  
326 adjacent to the injury site respond to the injury cue and proceed to behave like NSCs;  
327 they divide, migrate, self-renew and replace lost neurons. However, previous work has  
328 shown that during spinal cord regeneration after amputation, rather than injury, these  
329 glial cells can transdifferentiate and give rise to cells of both the ectodermal and  
330 mesodermal lineage (Echeverri and Tanaka, 2002, McHedlishvili et al., 2007). We next  
331 examined the expression of *brachyury* in the context of whole tail regeneration and  
332 discovered that *brachyury* is expressed in the *sox2*<sup>+</sup> stem cells of the spinal cord 500μm  
333 adjacent to the injury site at 7-days post amputation (**Fig. 5**). To determine if this is an  
334 attribute of the larval animals only, we also examined regenerating tail tissue from 2-year  
335 old adult animals and found that in response to tail amputation that these progenitor cells  
336 in the adult spinal cord indeed co-express *brachyury* and *sox2* during tail regeneration in  
337 adult (**Fig. 5**) and larval animals (**Fig.S4**). These data suggest that during the  
338 regenerative process the cells lining the central canal determine what tissue types need  
339 to be restored. When only a small portion of the neural tube must be regenerated  
340 following injury, the progenitor cells adopt a neural stem cell state to successfully

341 regenerate the spinal cord. During whole tail regeneration following amputation when  
342 multiple tissue lineages must be regenerated, these cells within the spinal cord become  
343 bipotent progenitors capable of making mesoderm and ectoderm (**Fig.6**).  
344 Collectively, these experiments have shed light on the context dependent nature of  
345 miRNA signaling during spinal cord lesion repair versus tail amputation and have  
346 identified new signaling pathways that regulate progenitor cell fate during axolotl spinal  
347 cord regeneration.

348

## 349 **Discussion**

350

351 The current study has identified miR-200a as a regulator of stem cell fate in the  
352 regenerating axolotl spinal cord. GO term analysis of genes down-regulated in the  
353 uninjured and 4 days post injury spinal cord after miR-200a inhibition showed that these  
354 genes were involved with nervous system development, organismal development,  
355 synaptic signaling, and cellular differentiation (**Fig.1, Fig.S1**). Specifically, genes  
356 involved with neuronal differentiation (*neurog1, neuroD4*) and neuronal processes like  
357 synaptic transmission (*CHRNA1, GABRA4*) and neurotransmitter uptake (*SLC6A6,*  
358 *SLC18A3, SLC6A14*) were down-regulated (**Fig.1, Fig. S1**). This suggests that miR-  
359 200a normally functions to promote NSC identity. This is consistent with multiple reports  
360 across various species that inhibition of miR-200a and other miR-200 family members  
361 results in the loss of neural progenitor identity and precocious neuronal or glial  
362 differentiation (Buller et al., 2012, Choi et al., 2008, Morante et al., 2013, Peng et al.,  
363 2012, Trumbach and Prakash, 2015, Vallejo et al., 2011). However, we have found that  
364 in the axolotl spinal cord that even in uninjured conditions in larval or adult axolotls, the  
365 cells lining the central canal in fact express low levels *brachyury* and *sox2*, the classical  
366 markers of mesoderm and neural stem cells (**Fig.1D, Fig.5**). These cells may represent  
367 a bipotent progenitor cell population and our data suggests that increased levels of  
368 *brachyury* are necessary for a progenitor to make the decision to exit the spinal cord and  
369 become a cell type of mesodermal origin (**Fig.6**).

370 During embryonic development in multiple species a small population of cells that  
371 co-express Sox2 and Brachyury have been identified and are now called  
372 neuromesodermal progenitor cells (Gouti et al., 2014, Henrique et al., 2015, Jurberg et  
373 al., 2013, Kimelman, 2016b, Taniguchi et al., 2017, Tsakiridis et al., 2014, Tsakiridis and  
374 Wilson, 2015, Turner et al., 2014b, Tzouanacou et al., 2009). Neuromesodermal

375 progenitor cell commitment to the neural lineage is partially determined by the relative  
376 levels of Sox2 compared to Brachyury, given that the two transcription factors function to  
377 antagonize one another (Koch et al., 2017a) and by the respective levels of *fgf* versus  
378 *wnt* that the progenitor cells encounter (refs). During axolotl development to date a  
379 definitive population of neuromesodermal progenitors has not been defined, however  
380 work published by Taniguichi et al has shown that a posterior region of the axolotl neural  
381 plate is positive for *brachyury* and *sox2* and this region gives rise to mesoderm during  
382 development (Taniguichi et al., 2017). This finding is consistent with the idea that the  
383 axolotl may also have a bipotent progenitor pool of cells established during early  
384 development, however more work is needed, especially lineage tracing to establish if  
385 these cells behave similar to what is seen in other species like chick, mouse and  
386 zebrafish. Our results here showing that by qRT-PCR and RNAscope *in situs* that  
387 *brachyury* and *sox2* are detected in the progenitor cells of the spinal cord in both larval  
388 and adult axolotls would suggest that axolotls retain a population of cells in the spinal  
389 cord throughout life that are bipotent. Work from McHedlishvili et al previously showed  
390 that adult axolotl retains expression of embryonic markers of dorsal/ventral patterning  
391 like *pax7*, *pax6* and *shh* genes that are not expressed in adult mammalian spinal cord  
392 (McHedlishvili et al., 2007). They additionally showed that like earlier lineage tracing  
393 work in axolotl, cells from the spinal cord do in fact migrate out and form a range of other  
394 cell types including blood vessels, skin, cartilage, and muscle cells. Overall, these  
395 bodies of work indicate that the cells in the axolotl spinal cord retain a multi-potent  
396 progenitor cell state and are capable to respond to injury cues which direct them towards  
397 different cell fates as needed. Very early work on tail regeneration in salamanders had  
398 already hinted that the terminal vesicle structure formed at the growing end of the spinal  
399 cord during tail regeneration is an area of epithelial to mesenchymal transition where  
400 cells delaminate from the neural tube and exit to contribute to regeneration of  
401 surrounding tissues of other developmental lineages (Benraiss et al., 1997, Egar and  
402 Singer, 1972, O'Hara et al., 1992). Our data now gives molecular insights into the  
403 identity of these cells. We found that miR-200a inhibited cells increase levels of  
404 *brachyury* and then these cells during regeneration of a spinal cord lesion will form  
405 muscle which is not observed in control regenerating lesions. However, we have not  
406 observed these cells to form cartilage, skin, fin mesenchyme of any other cell type. We  
407 cannot rule out that they have this potential, but the lineage tracing is limited as the  
408 fluorescent protein expression is driven by the GFAP promoter, we expect this promoter

409 is turned off as the cells differentiate and as we can only image very 3 days, we may in  
410 fact miss some differentiation events. We observed in all animals where miR-200a is  
411 inhibited that at least one muscle fiber is formed from the labelled cells, however, again  
412 we may be missing some differentiation events due to the limitations of our labelling  
413 technique.

414 It is still not clear whether Brachyury directly regulates Sox2 levels in the regenerating  
415 axolotl spinal cord or whether it is via an indirect mechanism. Work from other labs in  
416 other research organisms has indicated that Brachyury and Sox2 can have a mutually  
417 repressive relationship (Kimelman, 2016a, Koch et al., 2017b, Martin, 2016). We have  
418 shown that miR-200a directly regulates *brachyury* and  *$\beta$ -catenin* via seed sequences in  
419 the 3'UTR of these genes. When miR-200a is inhibited in the spinal cord cells, *brachyury*  
420 is expressed at higher levels in these cells but *fgf* and *wnt* levels are also perturbed.

421 Work in development on NMP's has shown that feedback loops exist between  
422 *brachyury*, *fgf* and *wnt* genes, and hence a complex signaling network may exist that is  
423 driven by specific levels of certain regulators in these cells at particular times. An  
424 additional level of complexity is the fact that Wnt is a secreted protein and although we  
425 see downregulation of it within the progenitor cells in the spinal cord, we also see that  
426 cells outside the spinal cord express *wnt* (**Fig.4**) and therefore the progenitor cells may  
427 also be influenced by external gradients of Wnt protein.

428 During development, Wnt and Fgf signaling tightly regulate neuromesodermal cell fate  
429 decisions (Goto et al., 2017, Gouti et al., 2017, Gouti et al., 2015, Martin, 2016) and both  
430 genes are known to play important roles in regeneration (Sun et al., 2002, Wilson et al.,  
431 2000, Zhang et al., 2000, Zhang et al., 2002b, Caubit et al., 1997, Ghosh et al., 2008,  
432 Lin G, 2008, Stoick-Cooper et al., 2007, Tanaka and Weidinger, 2008, Wehner et al.,  
433 2017, Zakany and Duboule, 1993). Canonical Wnt signaling is crucial for radial glial cell  
434 proliferation during neural tube development (Shtutman et al., 1999) and spinal cord  
435 regeneration in zebrafish (Briona et al., 2015). Therefore, it is not surprising to see a  
436 potential increase in Wnt signaling during spinal cord regeneration in axolotl. However, it  
437 is interesting that miR-200a does not regulate expression of *wnt* ligands, but instead  
438 regulates  *$\beta$ -catenin* levels (**Fig. S3**). This is reminiscent to the role of miR-200a in  
439 inhibiting EMT by repressing  *$\beta$ -catenin* and canonical Wnt signaling (Su et al., 2012,  
440 Zaravinos, 2015). The increase in *ctnnb1* levels after miR-200a inhibition is not  
441 statistically significant, however slight changes in transcript abundance can have  
442 profound effects on protein levels (Schwanhausser et al., 2011). Therefore, a modest

443 increase in transcript abundance could represent a biologically significant increase in  $\beta$ -  
444 *catenin* protein levels.  
445 The signals that inform injured cells what tissue must be replaced remain a mystery.  
446 Here we show that glial cells in the spinal cord appear to sense the difference between a  
447 lesion of the spinal cord that primarily needs replacement of neural stem cell and  
448 neurons, versus regeneration in the context of whole tail regeneration where cells of  
449 multiple developmental germ layer origin must be regenerated. Interestingly we find that  
450 cells of both the larval and adult tail regenerate bipotent progenitors that express  
451 *brachyury* and *sox2* in response to tail amputation, suggesting that the presence of  
452 these bipotent progenitors is not only a hallmark of embryonic development, but rather a  
453 stem cell population that is maintained in the animals specifically for regeneration. In the  
454 future it will be important to determine if all cells in the spinal cord have this potential or  
455 whether there are sub-populations of stem cells present in the axolotl spinal cord.

456

457

458

459

460

#### 461 Materials and Methods

462

#### 463 Animal Handling and Spinal Cord Injury

464 All axolotls used in these experiments were obtained and bred at the University  
465 of Minnesota or the Marine Biological Laboratory in accordance with IACUAC  
466 regulations. Prior to all *in vivo* experiments, animals (3-5cm) were anesthetized in 0.01%  
467 p-amino benzocaine (Sigma). Spinal cord ablations were performed as previously  
468 described (Diaz Quiroz et al., 2014, Sabin et al., 2015a). Briefly, a 26-gage needle was  
469 used to clear away skin and muscle to expose the spinal cord 6-10 muscle bundles  
470 caudal to the cloaca. Then, using the needle, a segment of spinal cord 1 muscle bundle  
471 thick, approximately 500 $\mu$ m, was removed. Animals were placed in cups and monitored  
472 for the duration of the experiments.

473

#### 474 Immunohistochemistry and EdU

475 Tissue was harvested and fixed in fresh 4% paraformaldehyde (Sigma) overnight  
476 at 4°C. Then tails were washed three times in phosphate buffered saline + 0.1% Tween

477 20 (PBSTw). Next the tails were incubated in a 50:50 solution of PBSTw and 30%  
478 sucrose. Finally, tails were transferred to 30% sucrose solution and allowed to  
479 equilibrate overnight at 4°C. The next day samples were embedded for cross-sectioning  
480 in TissueTek (Sakura) and stored at -20°C.

481 For EdU staining, animals were injected intraperitoneal with EdU at a  
482 concentration of 0.5 µg/µL in PBS+1% Fast Green at 5 and 7-days post injury then  
483 harvested at 14-days post injury. The tissue was processed for sectioning as described  
484 above and stained using the Click-iT EdU Imaging Kit (Invitrogen) according to the  
485 manufacturer's instructions.

486 After staining for EdU, samples were processed for immunohistochemical  
487 analysis using either anti-Sox2 (Abcam) or anti-NeuN (Chemicon) primary antibodies as  
488 previously described (Sabin et al., 2015a, Sabin et al., 2019). Briefly, slides were  
489 subjected to a boiling citrate antigen retrieval step and then washed with PBSTw 3 times  
490 for 5 minutes each. Samples were blocked (PBS+0.1% Triton-X+2% bovine serum  
491 albumin +2% goat serum) for an hour at room then incubated overnight at 4°C in primary  
492 antibodies diluted (1:100) in blocking buffer. The next day, slides were washed 4 times  
493 with PBSTw and then incubated with secondary antibody (Invitrogen) diluted in blocking  
494 buffer (1:200) for 2 hours at room temp and cell nuclei were counterstained with 4',6-  
495 diamidino-2-phenylindole (DAPI) (1:10,000). After secondary incubation the slides were  
496 washed four times with PBSTw and mounted in Prolong Anti-fade mounting solution  
497 (Invitrogen). All samples were imaged using an inverted Leica DMI 6000B fluorescent  
498 microscope.

499 All images were generated using Fiji and cells were counted with the Cell  
500 Counter plugin.

501

### 502 Quantitative Reverse Transcriptase Polymerase Chain Reaction

503 Injured spinal cords 500µm rostral and 300µm caudal to the lesion from 7-10  
504 control or miR-200a inhibitor electroporated animals were micro dissected and pooled  
505 for each biological replicate. Total RNA was isolated using Trizol (Invitrogen) according  
506 to the manufacturer's instructions. Subsequent cDNA was synthesized from 1 µg of  
507 DNaseI (NEB) treated RNA using either High Capacity cDNA Reverse Transcription kit  
508 (Applied Biosystems) or miScript II RT kit (Qiagen). The qRT-PCR was carried out using  
509 Light Cycler 480 SYBR Green I Master (Roche). MicroRNA qRT-PCR was carried out

510 with custom designed primers to conserved miRNAs (Qiagen) and custom primers from  
511 IDT were used to quantify axolotl mRNAs:

512

513 *18S\_F*: CGGCTTAATTTGACTCAACACG

514 *18S\_R*: TTAGCATGCCAGAGTCTCGTTC

515 *brachyury\_F*: GAAGTATGTCAACGGGGAAT

516 *brachyury\_R*: TTGTTGGTGAGCTTGACTTT

517 *sox2\_F*: TTGTGCAAATGTGTTTCCA

518 *sox2\_R*: CATGTTGCTTCGCTTTAGAA

519 *wnt3a\_F*: AAGACATGCTGGTGGTCTCA

520 *wnt3a\_R*: CCCGTACGCATTCTTGACAG

521 *wnt5a\_F*: ACCCTGTTCAAATCCCGGAG

522 *wnt5a\_R*: GGTCTTTGCCCTTCTCCAA

523 *wnt8a\_F*: TTGCTGTCAAATCAACCATG

524 *wnt8a\_R*: TGCCTATATCCCTGAACTCT

525 *ctnnb1\_F*: ACCTTACAGATCAAAGCCAG

526 *ctnnb1\_R*: GGACAAGTGTCCAAGAAGA

527 *lef1\_F*: GTCCCACAACCTCCTACCACA

528 *lef1\_R*: TAGGGGTCGCTGTTACATT

529 *fgf8\_F*: TTTGTCCTCTGCATGCAAGC

530 *fgf8\_R*: GTCTCGGCTCCTTTAATGCG

531 *fgf10\_F*: AAAGTGAAGGAGCGGATGGA

532 *fgf10\_R*: TCGATCTGCATGGGAAGGAA

533

#### 534 *Brachyury and Sox2 Probe Synthesis*

535 Approximately 500bp fragments of axolotl *brachyury* and *sox2* were PCR  
536 amplified using OneStep PCR Kit (Qiagen) from RNA extracted from axolotl embryos at  
537 various developmental stages using the following primers:

538

539 *brachyury* ISH For: CCCCAACGCCATGTACTCTT

540 *brachyury* ISH Rev: GGCCAAGCGATATAGGTGCT

541

542 *sox2* ISH For: TGGCAATCAGGAAGAAAGTC

543 *sox2* ISH Rev: GCAAATGACAGAGCCGAACT



544

545 The resulting PCR fragments were gel purified using the Monarch Gel  
546 Purification Kit (New England Biolabs) and TA cloned into pGEM-T Easy (Promega) then  
547 transformed into DH5 $\alpha$  competent *E. coli* (Invitrogen). Blue/White positive selection was  
548 used to pick clones and recovered plasmids were sent for sequencing. Positive clones  
549 were digested with the appropriate enzyme to linearize the plasmid and anti-sense  
550 ribonucleoprobe synthesis was carried out using Sp6 or T7 RNA polymerase (New  
551 England Biolabs)+DIG labeled UTP (Roche). Subsequent probes were cleaned up using  
552 the RNA Clean Up kit (Qiagen) and resuspended in hybridization buffer.

553

#### 554 Fluorescent In situ Hybridization

555 All RNAscope® *in situ* hybridization procedures were performed according to the  
556 manufacturer's instructions (Advanced Cell Diagnostics). In brief, cryosections were  
557 incubated in PBS for 10 minutes to remove the OCT, and then baked at 60°C for 30  
558 minutes. The slides were next post-fixed in 4% paraformaldehyde for 15 minutes at 4°C,  
559 and then dehydrated in a graded series of ethanol dilutions before being incubated in  
560 absolute ethanol for 5 minutes. After briefly air-drying the slides for 5 minutes, sections  
561 were next treated with hydrogen peroxide to quench endogenous peroxidase activity for  
562 10 minutes at room temperature. Next, samples were briefly washed in deionized water,  
563 then incubated in target retrieval buffer at 90°C for 5 minutes. Following target retrieval,  
564 the slides were rinsed in deionized water for 15 seconds and treated with absolute  
565 ethanol for 3 minutes. Slides were next permeabilized in protease III for 30 minutes  
566 before hybridization with RNAscope® probes at 40°C for 2 hours. Following  
567 hybridization, sections were placed in 5x SSC overnight. The next day, sections were  
568 incubated in Amp1 and Amp2 at 40°C for 30 minutes each, followed by Amp3 for 15  
569 minutes. Next, slides were treated with HRP-C1 to detect *brachyury* or *fgf10*, followed by  
570 a 30-minute incubation in Opal-690 fluorescent dye. After treatment with HRP blocking  
571 buffer, samples were next incubated in HRP-C2 to detect either *sox2* or *wnt5a*, followed  
572 by a 30-minute incubation in Opal-570 dye. After an additional treatment with HRP  
573 blocking buffer, slides were counterstained with DAPI and imaged using a Zeiss 780  
574 Confocal Microscope.

575

#### 576 Lineage Tracing

577 Cells of the uninjured spinal cord were transfected with a construct containing a GFP or  
578 tdTomato fluorescent protein under the control of the axolotl GFAP promoter. The cells  
579 were injected and electroporated as previously described (Echeverri and Tanaka, 2003a,  
580 Sabin et al., 2015a). One day after electroporation the animals were screened for  
581 fluorescent cells. Positive animals were then injected with a control inhibitor or miR-200a  
582 inhibitor and then a spinal cord lesion performed as described in (Sabin et al., 2019).  
583 Animals were imaged every 3 days until the lesion site was no longer visible and the  
584 animals regained motor and sensory function, typically 12-14 days post injury.

585

### 586 Cloning 3' Untranslated Regions for miRNA Luciferase Assays

587 For 3' UTR luciferase experiments, primers were designed to amplify the  
588 *brachyury* and  $\beta$ -*catenin* 3' UTR based off sequences obtained from axolotl-omics.org.  
589 All the 3' UTRs were amplified with a 5' Spel and 3' HindIII restriction site.

590

591 *brachyury* 3' UTR For 1 AGCACTAGTATGTGAAATGAGACTTCTAC

592 *brachyury* 3' UTR Rev 1 TGCAAGCTTCTTATTCTTCCCATTAACTTAAA

593

594 *ctnnb1* 3' UTR For 1 ATAAGTAGTTTGTGTAATTTTTCTTAGCTGTCATAT

595 *ctnnb1* 3' UTR Rev 1 ATCAAGCTTAATTGCTTTATAGTCTCTGCAGAT

596

597 *ctnnb1* 3' UTR SDM1 For AGTGCCTGATGAATTCAACCAAGCTGAG

598 *ctnnb1* 3' UTR SDM1 Rev CTCAGCTTGGTTGAATTCATCAGGCACT

599

600 *ctnnb1* 3' UTR SDM2 For ATTTAATGGTGTAGGAATTCAATAGTATAA

601 *ctnnb1* 3' UTR SDM2 Rev TTATACTATTGAATTCCTACACCATTAAAT

602

603 The PCR fragments and pMiR Report (Life Technologies) were digested with Spel and  
604 HindIII (NEB) and the fragments were ligated over night at 4°C with T4 DNA Ligase  
605 (NEB) and heat shock transformed into DH5 $\alpha$  competent *E. coli* (Promega).

606

### 607 Mutation of miR-200 sites in Brachyury 3' UTR

608 To mutate the 3 miR-200a and 3 miR-200b sites in the axolotl Brachyury 3' UTR,  
609 we used the QuikChange Lightning Multi Site-Directed Mutagenesis kit (Agilent) as per  
610 the manufacturer's instructions.

611

612 miR-200a1 SDM: gactgctttctatggacactttttaatttctgaagataagctcccaccg

613 miR-200a2 SDM: cacacataaatcttttcgtgctgaacaaattatgatccatgaaaccagtgcatcatt

614 miR-200a3 SDM: tccaatgtgtgaatcctctcaattatcgctctgcgtgtagaatgct

615

616 miR-200b1 SDM: atgcattacaatgcattgttttctggacggcaatgaaagctgtgatgaaatatttaagat

617 miR-200b2 SDM: caccataagagacaataaatgcaccggaatactgtgatatttgatgctgcac

618 miR-200b3 SDM: gaatcattaccatgtatttatcaggccggaatattcaaaatgtgacttctctgtga

619

### 620 3' UTR luciferase experiments

621 B35 neuroblastoma cells were plated in a 96 well plate (Celltreat Scientific  
622 Products) at a concentration of  $2.0 \times 10^5$  cells/mL and allowed to adhere overnight. The  
623 next day cells were co-transfected with the appropriate Luciferase 3' UTR reporter  
624 plasmid,  $\beta$ -Galactosidase control, and 100nM of miR-200a, miR-200b, or control mimic  
625 (Qiagen) per well using Lipofectamine 3000 (Invitrogen). After 48 hours luciferase  
626 activity was determined using Dual Light Luciferase &  $\beta$ -Galactosidase Reporter Gene  
627 Assay System (Thermo) according to the manufacturer's protocol.

628

### 629 Pie Chart and Venn Diagram Generation

630 Pie charts were generated using previously published data (Sabin et al., 2019) to  
631 represent the total number of differentially expressed genes in a given comparison using  
632 Excel. Venn Diagrams were generated with Venny (v2.1.0) (Oliveros 2007-2015) and  
633 saved as .csv files to be modified in Adobe Illustrator.

634

### 635 Gene Ontology (GO) Analysis

636 GO terms were determined using GOrilla (Eden et al., 2009). We used 2  
637 unranked list of genes: a background list (all differentially expressed genes in our data  
638 set) and a target list (genes that were differentially regulated in a given comparison).  
639 Using this approach, GOrilla generated a list of enriched Biological Process GO terms  
640 and we selected the top 9-13 terms with the lowest p-value and generated  
641 representative bar graphs using Excel.

642

### 643 Calculation of the proportion and distribution of neural stem cells and newborn neurons

644           The number of Sox2<sup>+</sup> neural stem cells were counted in control and miR-200a  
645 inhibitor spinal cords 2-weeks post injury. The proportion of Sox2<sup>+</sup> neural stem cells was  
646 calculated by dividing the total number of Sox2<sup>+</sup> neural stem cells by the total number of  
647 DAPI<sup>+</sup> spinal cord cells times 100. To analyze regenerative neurogenesis, control or  
648 miR-200a inhibitor animals were injected with EdU at 5 and 7-days post injury, then tails  
649 were harvested for cryosectioning at 14 days post injury. The proportion of newborn  
650 neurons was determined by dividing the number of NeuN<sup>+</sup>/EdU<sup>+</sup> double positive neurons  
651 by the total number of NeuN<sup>+</sup> neurons times 100.

652           To visualize whether the proportion of Sox2<sup>+</sup> neural stem cells changed rostral  
653 and caudal to the injury site in control and miR-200a inhibitor spinal cords, we quantified  
654 the average number of Sox2<sup>+</sup> neural stem cells at a defined distance rostral and caudal  
655 from the lesion. We divided that number by the average number of DAPI<sup>+</sup> spinal cord  
656 cells at that same distance and then binned the vales from 3 adjacent serial sections  
657 encompassing a region of 80µm. We used the same method for graphing the distribution  
658 of newborn neurons relative to the injury site.

659

#### 660 Statistical Analyses

661           All results are presented as mean +/- s.d. unless otherwise stated. Analyses  
662 were performed using Microsoft Excel or GraphPad Prism v8. Data set means were  
663 compared using ANOVA for three or more tests with a Tukey test (for multiple  
664 comparisons) or Dunnett test (to compare to a control mean). When two groups were  
665 compared an unpaired *t*-test was used. When multiple comparisons were made using a  
666 *t*-test, an adjusted p-value was determined using the two stage Benjamin, Krieger, and  
667 Yekutieli procedue with a false discovery rate <5%. Differences between groups was  
668 considered significant at three different levels (p-values of \*≤0.05, \*\*≤0.01 and  
669 \*\*\*≤0.001) and are indicated in the figure legends.

670

#### 671 **Acknowledgements**

672 We thank Ricardo Zayas for feedback on the manuscript.

673

#### 674 **Competing Interests**

675 The authors declare no competing financial interests.

676

#### 677 **Funding**

678 KS has been supported by a NIH T32 GM113846 grant. KE is supported by a grant from  
679 NICHD R01 HD092451, start-up funds from the MBL and funding from the Owens  
680 Family Foundation.

681

682 **Data Availability**

683 The authors declare that all data supporting the findings of this study are available within  
684 the article and its Supplementary Information files or from the corresponding author upon  
685 reasonable request. The RNA seq data has been deposited in the public GEO database  
686 with the accession number GSE122939.

687

688

689

## 690 **Figure Legends**

691 **Figure 1.** miR-200a inhibition during spinal cord injury leads to *brachyury* expression  
692 axolotl in spinal cord stem cells. (A) RNA-Sequencing analysis identified a large subset  
693 of differentially regulated genes following injury. The Vehn diagram compares the  
694 number of overlapping differentially expressed genes between uninjured, 4 days post  
695 injury control and miR-200a inhibitor treated samples. (B) Pie-chart showing the relative  
696 portion of all transcripts that are differentially regulated. Regeneration specific transcripts  
697 are defined as differentially expressed transcripts with a  $\log_2fc > 1$  or  $< -1$  and  $p_{adj} < 0.05$   
698 between 4dpi control animals and 4dpi animals treated with mir-200a inhibitor that were  
699 not differentially expressed in uninjured animals. (C) Log2fold change  
700 heat map demonstrates the 30 most up- and down-regulated genes in uninjured and 4  
701 days post injury control versus miR-200a inhibitor treated spinal cords. This analysis  
702 revealed that the transcription factor *brachyury* (*T*) is dramatically up-regulated after  
703 miR-200a inhibition. (D) qRT-PCR analysis confirmed that miR-200a inhibition led to  
704 increased *brachyury* expression and blocked the up-regulation of the neural stem cell  
705 marker *sox2* in 4 days post injury (dpi) spinal cords (n=3). (E) Fluorescent *In situ*  
706 hybridization confirmed the qRT-PCR analysis and revealed miR-200a inhibition leads to  
707 *brachyury* expression (n=5) in spinal cord cells and a failure to up-regulate *sox2*  
708 expression (n=3). \* $p \leq 0.05$ , \*\* $p \leq 0.01$ , \*\*\*  $p \leq 0.001$ , N.S. is not significant. Error bars  
709 represent  $\pm$ S.T.D. Scale bar= 50 $\mu$ m.

710  
711 **Figure 2:** Chronic miR-200a inhibition affects the birth of new neurons. Inhibition of miR-  
712 200a for 2 weeks does not affect the (A) proportion or (B) distribution of Sox2<sup>+</sup> stem cells  
713 in the spinal cord throughout the regeneration zone (n=6). Inhibition of miR-200a for 2  
714 weeks results in a smaller proportion of new born neurons compared to controls (C).  
715 (D) An increased proportion of new born neurons reside closer to the injury site while  
716 chronic miR-200a inhibition blocked this increase in new born neurons close to the injury  
717 site. (n=6). \* $p \leq 0.05$ , \*\* $p \leq 0.01$ , \*\*\*  $p \leq 0.001$ , N.S. is not significant. Error bars represent  
718  $\pm$ S.T.D.

719  
720 **Figure 3:** miR-200a inhibited spinal cord cells form muscle during spinal cord lesion  
721 repair. The cells lining the central canal of the spinal cord were labelled using GFAP  
722 promoter driving GFP or tdTomato by injection and electroporation. Control cells were  
723 followed over a 14 day period and cells gave rise to new glial cells or neurons only (A-F)  
724 (n=20). Cells which were injected with the miR-200a inhibitor were followed in parallel  
725 over the same time period and were found to exit the spinal cord and give rise to muscle  
726 cells (G-L). (n=25). Scale bar = 50 $\mu$ m.

727  
728 **Figure 4:** miR-200a inhibition affects the expression of Wnt and FGF signaling ligands.  
729 (A) qRT-PCR analysis revealed *fgf10*, but not *fgf8*, was significantly up-regulated after  
730 miR-200a inhibition (n=3). (B) qRT-PCR analysis showed that miR-200a inhibition  
731 differentially affects the expression of *wnt5a*, but not additional Wnt ligands (*wnt3a*,  
732 *wnt8a*; n=3). (C) Fluorescent *in situ* hybridization in control (C) and miR-200a inhibitor  
733 treated (D) animals confirmed the qRT-PCR analysis, and demonstrates an increase in

734 *fgf10* expression and a down-regulation of *wnt5a* within stem cells in the spinal cord  
735 (n=6). \*p≤0.05, \*\*p≤0.01, \*\*\* p≤0.001, N.S. is not significant. Error bars represent  
736 ±S.T.D. Scale bar= 50µm.

737

738 **Figure 5.** Spinal cord amputation leads to *brachyury* expression in spinal cord stem  
739 cells. (Ai-iv) Fluorescent *in situ* hybridization revealed that *sox2* is abundant within the  
740 uninjured adult spinal cord, while *brachyury* is absent (n=2). (Bi-iv) At 7 days post  
741 amputation, *brachyury* was localized to spinal cord stem cells that share an overlapping  
742 expression pattern with *sox2* (n=2). Scale bar= 50µm.

743

744 **Figure 6.** A proposed model for the role that miR-200a plays in different injury  
745 paradigms. When a lesion occurs in the spinal cord miR-200a levels remain high, which  
746 inhibits *brachyury* expression and modifies levels of *β-catenin*, potentially stabilizing a  
747 neural stem cell identity in the cells adjacent to the injury site. After spinal cord injury  
748 these cells replace neurons and glial only. In contrast, when the tail is amputated  
749 progenitor cells respond to injury cues and replace multiple cell types of different  
750 developmental origins. These cells in the spinal cord then up-regulate *brachyury* in the  
751 *sox2*<sup>+</sup> stem cells of the spinal cord and direct these cells to proliferate and form cells of  
752 both ectodermal and mesodermal origin.

753

754 **Supplementary Figure 1:** miR-200a affects expression of common and unique gene  
755 sets in the uninjured and regenerating spinal cord. (A, B, C) Pie chart representation of  
756 the proportion of up-regulated (Red) or down-regulated (Blue) genes in (B) uninjured  
757 control compared to uninjured miR-200a inhibitor electroporated spinal cords or (A) 4  
758 days post injury control compared to 4 days post injury miR-200a inhibitor electroporated  
759 spinal cords. (C). Pie chart illustrating the number of overlapping versus individual genes  
760 that are differentially regulated. (B-F) Gene Ontology terms enriched in gene specifically  
761 in (B) control regenerating or (E) genes common to all data sets or specific to uninjured  
762 tissue (F).

763

764 **Supplementary Figure 2:** Multiple miR-200 members directly regulate the *brachyury* 3'  
765 UTR. (A) Co-transfection of B35 cells with a *brachyury* 3' luciferase reporter and a miR-  
766 200a (A) or miR-200b (B) mimic results in decreased luciferase activity compared to the  
767 control mimic (n=5). Mutation of all miR-200a seed sequences in the *brachyury* 3' UTR  
768 alleviates this repression suggesting it is a direct target of miR-200 in axolotl (n=4). \*\*\*  
769 p≤0.001, N.S. is not significant. Error bars represent ±S.T.D.

770

771 **Supplementary Figure 3:** miR-200a may regulate the expression of Wnt signaling  
772 components. (A) qRT-PCR analysis revealed that miR-200a inhibition leads to increased

773 expression of Wnt signaling transcriptional components *lef1* and  $\beta$ -*catenin*. (B) Co-  
774 transfection of B35 cells with a  $\beta$ -*catenin* 3' UTR luciferase reporter and a miR-200a  
775 mimic leads to decreased luciferase activity compared to controls. Mutation of both miR-  
776 200a seed sequences in the  $\beta$ -*catenin* 3' UTR alleviates this repression (n=3). \* $p \leq 0.05$ ,  
777 \*\*\*  $p \leq 0.001$ , N.S. is not significant. Error bars represent  $\pm$ S.T.D.

778

779 **Supplementary Figure 4:** *brachyury* is expressed in regenerating spinal cord stem cells  
780 following amputation in larval animals. At 4 days post amputation (dpa) both *sox2* (ii)  
781 and *brachyury* (iii) are abundant in the spinal cord stem cells and share an overlapping  
782 expression pattern (iv)(n=6). Scale bar= 50mm.

783

784

785

786

787

788

789

790

- 791 ALBORS, A. R., TAZAKI, A., ROST, F., NOWOSHILOW, S., CHARA, O. &  
792 TANAKA, E. M. 2015. Planar cell polarity-mediated induction of neural stem  
793 cell expansion during axolotl spinal cord regeneration. *eLife*, 4, 1-29.
- 794 ARNOLD, S. J., STAPPERT, J., BAUER, A., KISPERS, A., HERRMANN, B. G. &  
795 KEMLER, R. 2000. *Brachyury* is a target gene of the Wnt/beta-catenin signaling  
796 pathway. *Mech Dev*, 91, 249-58.
- 797 BENRAISS, A., ARSANTO, J. P., COULON, J. & THOUVENY, Y. 1997. Neural Crest-  
798 Like Cells Originate From the Spinal Cord During Tail Regeneration in Adult  
799 Amphibian Urodels. *Developmental Dynamics*, 209, 15-28.
- 800 BOULDIN, C. M., MANNING, A. J., PENG, Y. H., FARR, G. H., 3RD, HUNG, K. L.,  
801 DONG, A. & KIMELMAN, D. 2015. Wnt signaling and *tbx16* form a bistable  
802 switch to commit bipotential progenitors to mesoderm. *Development*, 142, 2499-  
803 507.
- 804 BRIONA, L. K., POULAIN, F. E., MOSIMANN, C. & DORSKY, R. I. 2015. Wnt/ss-  
805 catenin signaling is required for radial glial neurogenesis following spinal cord  
806 injury. *Dev Biol*, 403, 15-21.
- 807 BULLER, B., CHOPP, M., UENO, Y., ZHANG, L., ZHANG, R. L., MORRIS, D.,  
808 ZHANG, Y. & ZHANG, Z. G. 2012. Regulation of serum response factor by  
809 miRNA-200 and miRNA-9 modulates oligodendrocyte progenitor cell  
810 differentiation. *Glia*, 60, 1906-14.
- 811 BUTLER, E. G. & WARD, M. B. 1965. Reconstitution of the spinal cord following  
812 ablation in urodele larvae. *J Exp Zool*, 160, 47-65.



- 813 BUTLER, E. G. & WARD, M. B. 1967. Reconstitution of the spinal cord after ablation in  
814 adult Triturus. *Dev Biol*, 15, 464-86.
- 815 CAUBIT, X., NICOLAS, S., SHI, D. L. & LEPARCO, Y. 1997. Reactivation and graded  
816 axial expression pattern of Wnt-10a gene during early regeneration stages of adult  
817 tail in amphibian urodele *Pleurodeles walt*. *Dev. Dyn.*, 208, 139-148.
- 818 CHOI, P. S., ZAKHARY, L., CHOI, W. Y., CARON, S., ALVAREZ-SAAVEDRA, E.,  
819 MISKA, E. A., MCMANUS, M., HARFE, B., GIRALDEZ, A. J., HORVITZ, H.  
820 R., SCHIER, A. F. & DULAC, C. 2008. Members of the miRNA-200 family  
821 regulate olfactory neurogenesis. *Neuron*, 57, 41-55.
- 822 CLARKE, J. D., ALEXANDER, R. & HOLDER, N. 1988. Regeneration of descending  
823 axons in the spinal cord of the axolotl. *Neurosci Lett*, 89, 1-6.
- 824 DIAZ QUIROZ, J. F., TSAI, E., COYLE, M., SEHM, T. & ECHEVERRI, K. 2014.  
825 Precise control of miR-125b levels is required to create a regeneration-permissive  
826 environment after spinal cord injury: a cross-species comparison between  
827 salamander and rat. *Dis Model Mech*, 7, 601-11.
- 828 ECHEVERRI, K. & TANAKA, E. M. 2002. Ectoderm to mesoderm lineage switching  
829 during axolotl tail regeneration. *Science*, 298, 1993-6.
- 830 ECHEVERRI, K. & TANAKA, E. M. 2003a. Electroporation as a tool to study in vivo  
831 spinal cord regeneration. *Dev Dyn*, 226, 418-25.
- 832 EDEN, E., NAVON, R., STEINFELD, I., LIPSON, D. & YAKHINI, Z. 2009. GOrilla: a  
833 tool for discovery and visualization of enriched GO terms in ranked gene lists.  
834 *BMC Bioinformatics*, 10, 48.
- 835 EGAR, M. & SINGER, M. 1972. The role of ependyma in spinal cord regeneration in the  
836 urodele, Triturus. *Exp Neurol*, 37, 422-30.
- 837 FEI, J.-F., KNAPP, D., SCHUEZ, M., MURAWALA, P., ZOU, Y., PAL SINGH, S.,  
838 DRECHSEL, D. & TANAKA, E. M. 2016. Tissue- and time-directed  
839 electroporation of CAS9 protein-gRNA complexes in vivo yields efficient  
840 multigene knockout for studying gene function in regeneration. *Npj Regenerative  
841 Medicine*, 1, 16002.
- 842 FEI, J. F., SCHUEZ, M., TAZAKI, A., TANIGUCHI, Y., ROENSCH, K. & TANAKA,  
843 E. M. 2014a. CRISPR-mediated genomic deletion of Sox2 in the axolotl shows a  
844 requirement in spinal cord neural stem cell amplification during tail regeneration.  
845 *Stem Cell Reports*, 3, 444-59.
- 846 FEI, J. F., SCHUEZ, M., TAZAKI, A., TANIGUCHI, Y., ROENSCH, K. & TANAKA,  
847 E. M. 2014b. CRISPR-mediated genomic deletion of Sox2 in the axolotl shows a  
848 requirement in spinal cord neural stem cell amplification during tail regeneration.  
849 *Stem Cell Reports*, 3, 444-459.
- 850 FILALI, M., CHENG, N., ABBOTT, D., LEONTIEV, V. & ENGELHARDT, J. F. 2002.  
851 Wnt-3A/beta-catenin signaling induces transcription from the LEF-1 promoter. *J  
852 Biol Chem*, 277, 33398-410.
- 853 GARRIOCK, R. J., CHALAMALASETTY, R. B., KENNEDY, M. W., CANIZALES, L.  
854 C., LEWANDOSKI, M. & YAMAGUCHI, T. P. 2015. Lineage tracing of  
855 neuromesodermal progenitors reveals novel Wnt-dependent roles in trunk  
856 progenitor cell maintenance and differentiation. *Development*, 142, 1628-38.

- 857 GEARHART, M. D., ERICKSON, J. R., WALSH, A. & ECHEVERRI, K. 2015.  
858 Identification of Conserved and Novel MicroRNAs during Tail Regeneration in  
859 the Mexican Axolotl. *Int J Mol Sci*, 16, 22046-61.
- 860 GHOSH, S., ROY, S., SEGUIN, C., BRYANT, S. V. & GARDINER, D. M. 2008.  
861 Analysis of the expression and function of Wnt-5a and Wnt-5b in developing and  
862 regenerating axolotl (*Ambystoma mexicanum*) limbs. *Dev Growth Differ*, 50,  
863 289-97.
- 864 GOTO, H., KIMMEY, S. C., ROW, R. H., MATUS, D. Q. & MARTIN, B. L. 2017. FGF  
865 and canonical Wnt signaling cooperate to induce paraxial mesoderm from tailbud  
866 neuromesodermal progenitors through regulation of a two-step epithelial to  
867 mesenchymal transition. *Development*, 144, 1412-1424.
- 868 GOUTI, M., DELILE, J., STAMATAKI, D., WYMEERSCH, F. J., HUANG, Y.,  
869 KLEINJUNG, J., WILSON, V. & BRISCOE, J. 2017. A Gene Regulatory  
870 Network Balances Neural and Mesoderm Specification during Vertebrate Trunk  
871 Development. *Dev Cell*, 41, 243-261 e7.
- 872 GOUTI, M., METZIS, V. & BRISCOE, J. 2015. The route to spinal cord cell types: a tale  
873 of signals and switches. *Trends Genet*, 31, 282-9.
- 874 GOUTI, M., TSAKIRIDIS, A., WYMEERSCH, F. J., HUANG, Y., KLEINJUNG, J.,  
875 WILSON, V. & BRISCOE, J. 2014. In vitro generation of neuromesodermal  
876 progenitors reveals distinct roles for wnt signalling in the specification of spinal  
877 cord and paraxial mesoderm identity. *PLoS Biol*, 12, e1001937.
- 878 HENRIQUE, D., ABRANCHES, E., VERRIER, L. & STOREY, K. G. 2015.  
879 Neuromesodermal progenitors and the making of the spinal cord. *Development*,  
880 142, 2864-75.
- 881 JURBERG, A. D., AIRES, R., VARELA-LASHERAS, I., NÓVOA, A. & MALLO, M.  
882 2013. Switching axial progenitors from producing trunk to tail tissues in  
883 vertebrate embryos. *Dev Cell*, 25, 451-62.
- 884 KARRES, J. S., HILGERS, V., CARRERA, I., TREISMAN, J. & COHEN, S. M. 2007.  
885 The conserved microRNA miR-8 tunes atrophin levels to prevent  
886 neurodegeneration in *Drosophila*. *Cell*, 131, 136-45.
- 887 KIMELMAN, D. 2016a. A novel cold-sensitive mutant of *ntla* reveals temporal roles of  
888 brachyury in zebrafish. *Dev Dyn*, 245, 874-80.
- 889 KIMELMAN, D. 2016b. Tales of Tails (and Trunks): Forming the Posterior Body in  
890 Vertebrate Embryos. *Curr Top Dev Biol*, 116, 517-36.
- 891 KOCH, F., SCHOLZE, M., WITTLER, L., SCHIFFERL, D., SUDHEER, S., GROTE,  
892 P., TIMMERMANN, B., MACURA, K. & HERRMANN, B. G. 2017a.  
893 Antagonistic Activities of Sox2 and Brachyury Control the Fate Choice of Neuro-  
894 Mesodermal Progenitors. *Dev Cell*, 42, 514-526 e7.
- 895 KOCH, F., SCHOLZE, M., WITTLER, L., SCHIFFERL, D., SUDHEER, S., GROTE,  
896 P., TIMMERMANN, B., MACURA, K. & HERRMANN, B. G. 2017b.  
897 Antagonistic Activities of Sox2 and Brachyury Control the Fate Choice of Neuro-  
898 Mesodermal Progenitors. *Dev Cell*, 42, 514-526.e7.
- 899 LEPP, A. C. & CARLONE, R. L. 2014. RARbeta2 expression is induced by the down-  
900 regulation of microRNA 133a during caudal spinal cord regeneration in the adult  
901 newt. *Dev Dyn*, 243, 1581-90.

- 902 LIN G, S. J. M. 2008. Requirement for Wnt and FGF signaling in *Xenopus* tadpole tail  
903 regeneration. *Dev Biol.*, 16, 323-35.
- 904 MAKANAE, A., MITOGAWA, K. & SATOH, A. 2016. Cooperative inputs of Bmp and  
905 Fgf signaling induce tail regeneration in urodele amphibians. *Dev Biol*, 410, 45-  
906 55.
- 907 MARTIN, B. L. 2016. Factors that coordinate mesoderm specification from  
908 neuromesodermal progenitors with segmentation during vertebrate axial  
909 extension. *Semin Cell Dev Biol*, 49, 59-67.
- 910 MARTIN, B. L. & KIMELMAN, D. 2008. Regulation of canonical Wnt signaling by  
911 Brachyury is essential for posterior mesoderm formation. *Dev Cell*, 15, 121-33.
- 912 MCHEDLISHVILI, L., EPPERLEIN, H. H., TELZEROW, A. & TANAKA, E. M. 2007.  
913 A clonal analysis of neural progenitors during axolotl spinal cord regeneration  
914 reveals evidence for both spatially restricted and multipotent progenitors.  
915 *Development*, 134, 2083-93.
- 916 MCHEDLISHVILI, L., MAZUROV, V., GRASSME, K. S., GOEHLER, K., ROBL, B.,  
917 TAZAKI, A., ROENSCH, K., DUEMLER, A. & TANAKA, E. M. 2012.  
918 Reconstitution of the central and peripheral nervous system during salamander tail  
919 regeneration. *Proc Natl Acad Sci U S A*, 109, E2258-66.
- 920 MONAGHAN, J. R., WALKER, J. A., PAGE, R. B., PUTTA, S., BEACHY, C. K. &  
921 VOSS, S. R. 2007. Early gene expression during natural spinal cord regeneration  
922 in the salamander *Ambystoma mexicanum*. *J Neurochem*, 101, 27-40.
- 923 MORANTE, J., VALLEJO, D. M., DESPLAN, C. & DOMINGUEZ, M. 2013.  
924 Conserved miR-8/miR-200 defines a glial niche that controls neuroepithelial  
925 expansion and neuroblast transition. *Dev Cell*, 27, 174-187.
- 926 O'HARA, C. M., EGAR, M. W. & CHERNOFF, E. A. 1992. Reorganization of the  
927 ependyma during axolotl spinal cord regeneration: changes in intermediate  
928 filament and fibronectin expression. *Dev Dyn*, 193, 103-15.
- 929 PANDEY, A., SINGH, P., JAUHARI, A., SINGH, T., KHAN, F., PANT, A. B.,  
930 PARMAR, D. & YADAV, S. 2015. Critical role of the miR-200 family in  
931 regulating differentiation and proliferation of neurons. *J Neurochem*, 133, 640-52.
- 932 PENG, C., LI, N., NG, Y. K., ZHANG, J., MEIER, F., THEIS, F. J.,  
933 MERKENSCHLAGER, M., CHEN, W., WURST, W. & PRAKASH, N. 2012. A  
934 unilateral negative feedback loop between miR-200 microRNAs and Sox2/E2F3  
935 controls neural progenitor cell-cycle exit and differentiation. *J Neurosci*, 32,  
936 13292-308.
- 937 PIATT, J. 1955. Regeneration of the Spinal Cord in the Salamander. *Journal of*  
938 *Experimental Zoology*, 129, 177-207.
- 939 PONOMAREVA, L. V., ATHIPPOZHAY, A., THORSON, J. S. & VOSS, S. R. 2015.  
940 Using *Ambystoma mexicanum* (Mexican axolotl) embryos, chemical genetics,  
941 and microarray analysis to identify signaling pathways associated with tissue  
942 regeneration. *Comp Biochem Physiol C Toxicol Pharmacol*, 178, 128-135.
- 943 RODRIGO ALBORS, A., TAZAKI, A., ROST, F., NOWOSHILOW, S., CHARA, O. &  
944 TANAKA, E. M. 2015. Planar cell polarity-mediated induction of neural stem  
945 cell expansion during axolotl spinal cord regeneration. *Elife*, 4, e10230.

- 946 SABIN, K., SANTOS-FERREIRA, T., ESSIG, J., RUDASILL, S. & ECHEVERRI, K.  
947 2015a. Dynamic membrane depolarization is an early regulator of ependymoglia  
948 cell response to spinal cord injury in axolotl. *Dev Biol*, 408, 14-25.
- 949 SABIN, K. Z., JIANG, P., GEARHART, M. D., STEWART, R. & ECHEVERRI, K.  
950 2019. AP-1(cFos/JunB)/miR-200a regulate the pro-regenerative glial cell  
951 response during axolotl spinal cord regeneration. *Commun Biol*, 2, 91.
- 952 SANCHEZ ALVARADO, A. & TSONIS, P. A. 2006. Bridging the regeneration gap:  
953 genetic insights from diverse animal models. *Nat Rev Genet.*, 11, 873-84.
- 954 SCHNAPP, E., KRAGL, M., RUBIN, L. & TANAKA, E. M. 2005. Hedgehog signaling  
955 controls dorsoventral patterning, blastema cell proliferation and cartilage  
956 induction during axolotl tail regeneration. *Development*, 132, 3243-53.
- 957 SCHWANHAUSSER, B., BUSSE, D., LI, N., DITTMAR, G., SCHUCHHARDT, J.,  
958 WOLF, J., CHEN, W. & SELBACH, M. 2011. Global quantification of  
959 mammalian gene expression control. *Nature*, 473, 337-42.
- 960 SEHM, T., SACHSE, C., FRENZEL, C. & ECHEVERRI, K. 2009. miR-196 is an  
961 essential early-stage regulator of tail regeneration, upstream of key spinal cord  
962 patterning events. *Dev Biol*, 334, 468-80.
- 963 SHTUTMAN, M., ZHURINSKY, J., SIMCHA, I., ALBANESE, C., D'AMICO, M.,  
964 PESTELL, R. & BEN-ZE'EV, A. 1999. The cyclin D1 gene is a target of the beta-  
965 catenin/LEF-1 pathway. *Proc Natl Acad Sci U S A*, 96, 5522-7.
- 966 STOICK-COOPER, C., WEIDINGER, G., RIEHLE, K., HUBBERT, C., MAJOR, M.,  
967 FAUSTO, N. & MOON, R. 2007. Distinct Wnt signaling pathways have opposing  
968 roles in appendage regeneration. *Development*, 134, 479-89.
- 969 SU, J., ZHANG, A., SHI, Z., MA, F., PU, P., WANG, T., ZHANG, J., KANG, C. &  
970 ZHANG, Q. 2012. MicroRNA-200a suppresses the Wnt/beta-catenin signaling  
971 pathway by interacting with beta-catenin. *Int J Oncol*, 40, 1162-70.
- 972 SUN, X., MARIANI, F. V. & MARTIN, G. R. 2002. Functions of FGF signalling from  
973 the apical ectodermal ridge in limb development. *Nature*, 418, 501-508.
- 974 TANAKA, E. M. & WEIDINGER, G. 2008. Heads or tails: can Wnt tell which one is  
975 up? *Nat Cell Biol*, 10, 122-4.
- 976 TANIGUCHI, Y., KURTH, T., WEICHE, S., REICHEL, S., TAZAKI, A., PERIKE, S.,  
977 KAPPERT, V. & EPPERLEIN, H. H. 2017. The posterior neural plate in axolotl  
978 gives rise to neural tube or turns anteriorly to form somites of the tail and  
979 posterior trunk. *Dev Biol*, 422, 155-170.
- 980 TRUMBACH, D. & PRAKASH, N. 2015. The conserved miR-8/miR-200 microRNA  
981 family and their role in invertebrate and vertebrate neurogenesis. *Cell Tissue Res*,  
982 359, 161-77.
- 983 TSAKIRIDIS, A., HUANG, Y., BLIN, G., SKYLAKI, S., WYMEERSCH, F.,  
984 OSORNO, R., ECONOMOU, C., KARAGIANNI, E., ZHAO, S., LOWELL, S. &  
985 WILSON, V. 2014. Distinct Wnt-driven primitive streak-like populations reflect  
986 in vivo lineage precursors. *Development*, 141, 1209-21.
- 987 TSAKIRIDIS, A. & WILSON, V. 2015. Assessing the bipotency of in vitro-derived  
988 neuromesodermal progenitors. *F1000Res*, 4, 100.
- 989 TURNER, D. A., HAYWARD, P. C., BAILLIE-JOHNSON, P., RUE, P., BROOME, R.,  
990 FAUNES, F. & MARTINEZ ARIAS, A. 2014a. Wnt/beta-catenin and FGF  
991 signalling direct the specification and maintenance of a neuromesodermal axial

- 992 progenitor in ensembles of mouse embryonic stem cells. *Development*, 141, 4243-  
993 53.
- 994 TURNER, D. A., HAYWARD, P. C., BAILLIE-JOHNSON, P., RUÉ, P., BROOME, R.,  
995 FAUNES, F. & MARTINEZ ARIAS, A. 2014b. Wnt/ $\beta$ -catenin and FGF  
996 signalling direct the specification and maintenance of a neuromesodermal axial  
997 progenitor in ensembles of mouse embryonic stem cells. *Development*, 141, 4243-  
998 53.
- 999 TZOUANACOU, E., WEGENER, A., WYMEERSCH, F. J., WILSON, V. & NICOLAS,  
1000 J. F. 2009. Redefining the progression of lineage segregations during mammalian  
1001 embryogenesis by clonal analysis. *Dev Cell*, 17, 365-76.
- 1002 VALLEJO, D. M., CAPARROS, E. & DOMINGUEZ, M. 2011. Targeting Notch  
1003 signalling by the conserved miR-8/200 microRNA family in development and  
1004 cancer cells. *EMBO J*, 30, 756-69.
- 1005 WANG, G., GUO, X., HONG, W., LIU, Q., WEI, T., LU, C., GAO, L., YE, D., ZHOU,  
1006 Y., CHEN, J., WANG, J., WU, M., LIU, H. & KANG, J. 2013. Critical regulation  
1007 of miR-200/ZEB2 pathway in Oct4/Sox2-induced mesenchymal-to-epithelial  
1008 transition and induced pluripotent stem cell generation. *Proc Natl Acad Sci U S A*,  
1009 110, 2858-63.
- 1010 WEHNER, D., TSAROUCHAS, T. M., MICHAEL, A., HAASE, C., WEIDINGER, G.,  
1011 REIMER, M. M., BECKER, T. & BECKER, C. G. 2017. Wnt signaling controls  
1012 pro-regenerative Collagen XII in functional spinal cord regeneration in zebrafish.  
1013 *Nat Commun*, 8, 126.
- 1014 WILSON, S. I., GRAZIANO, E., HARLAND, R., JESSELL, T. M. & EDLUND, T.  
1015 2000. An early requirement for FGF signalling in the acquisition of neural cell  
1016 fate in the chick embryo. *Curr Biol*, 10, 421-9.
- 1017 WYMEERSCH, F. J., HUANG, Y., BLIN, G., CAMBRAY, N., WILKIE, R., WONG, F.  
1018 C. & WILSON, V. 2016. Position-dependent plasticity of distinct progenitor types  
1019 in the primitive streak. *Elife*, 5, e10042.
- 1020 YAMAGUCHI, T. P., TAKADA, S., YOSHIKAWA, Y., WU, N. & MCMAHON, A. P.  
1021 1999. T (Brachyury) is a direct target of Wnt3a during paraxial mesoderm  
1022 specification. *Genes Dev*, 13, 3185-90.
- 1023 ZAKANY, J. & DUBOULE, D. 1993. Correlation of expression of Wnt-1 in developing  
1024 limbs with abnormalities in growth and skeletal patterning. *Nature*, 362, 546-9.
- 1025 ZARAVINOS, A. 2015. The Regulatory Role of MicroRNAs in EMT and Cancer. *J*  
1026 *Oncol*, 2015, 865816.
- 1027 ZHANG, F., CLARKE, J. D. & FERRETTI, P. 2000. FGF-2 Up-regulation and  
1028 proliferation of neural progenitors in the regenerating amphibian spinal cord in  
1029 vivo. *Dev Biol*, 225, 381-91.
- 1030 ZHANG, F., CLARKE, J. D., SANTOS-RUIZ, L. & FERRETTI, P. 2002a. Differential  
1031 regulation of fibroblast growth factor receptors in the regenerating amphibian  
1032 spinal cord in vivo. *Neuroscience*, 114, 837-48.
- 1033 ZHANG, F., CLARKE, J. D. W. & FERRETTI, P. 2002b. Differential regulation of  
1034 FGFRs in the regenerating amphibian spinal cord. *Neuroscience*, 114, 837-848.
- 1035 ZUKOR, K. A., KENT, D. T. & ODELBURG, S. J. 2011. Meningeal cells and glia  
1036 establish a permissive environment for axon regeneration after spinal cord injury  
1037 in newts. *Neural Dev*, 6, 1.  
1038

# Figure 1

A.

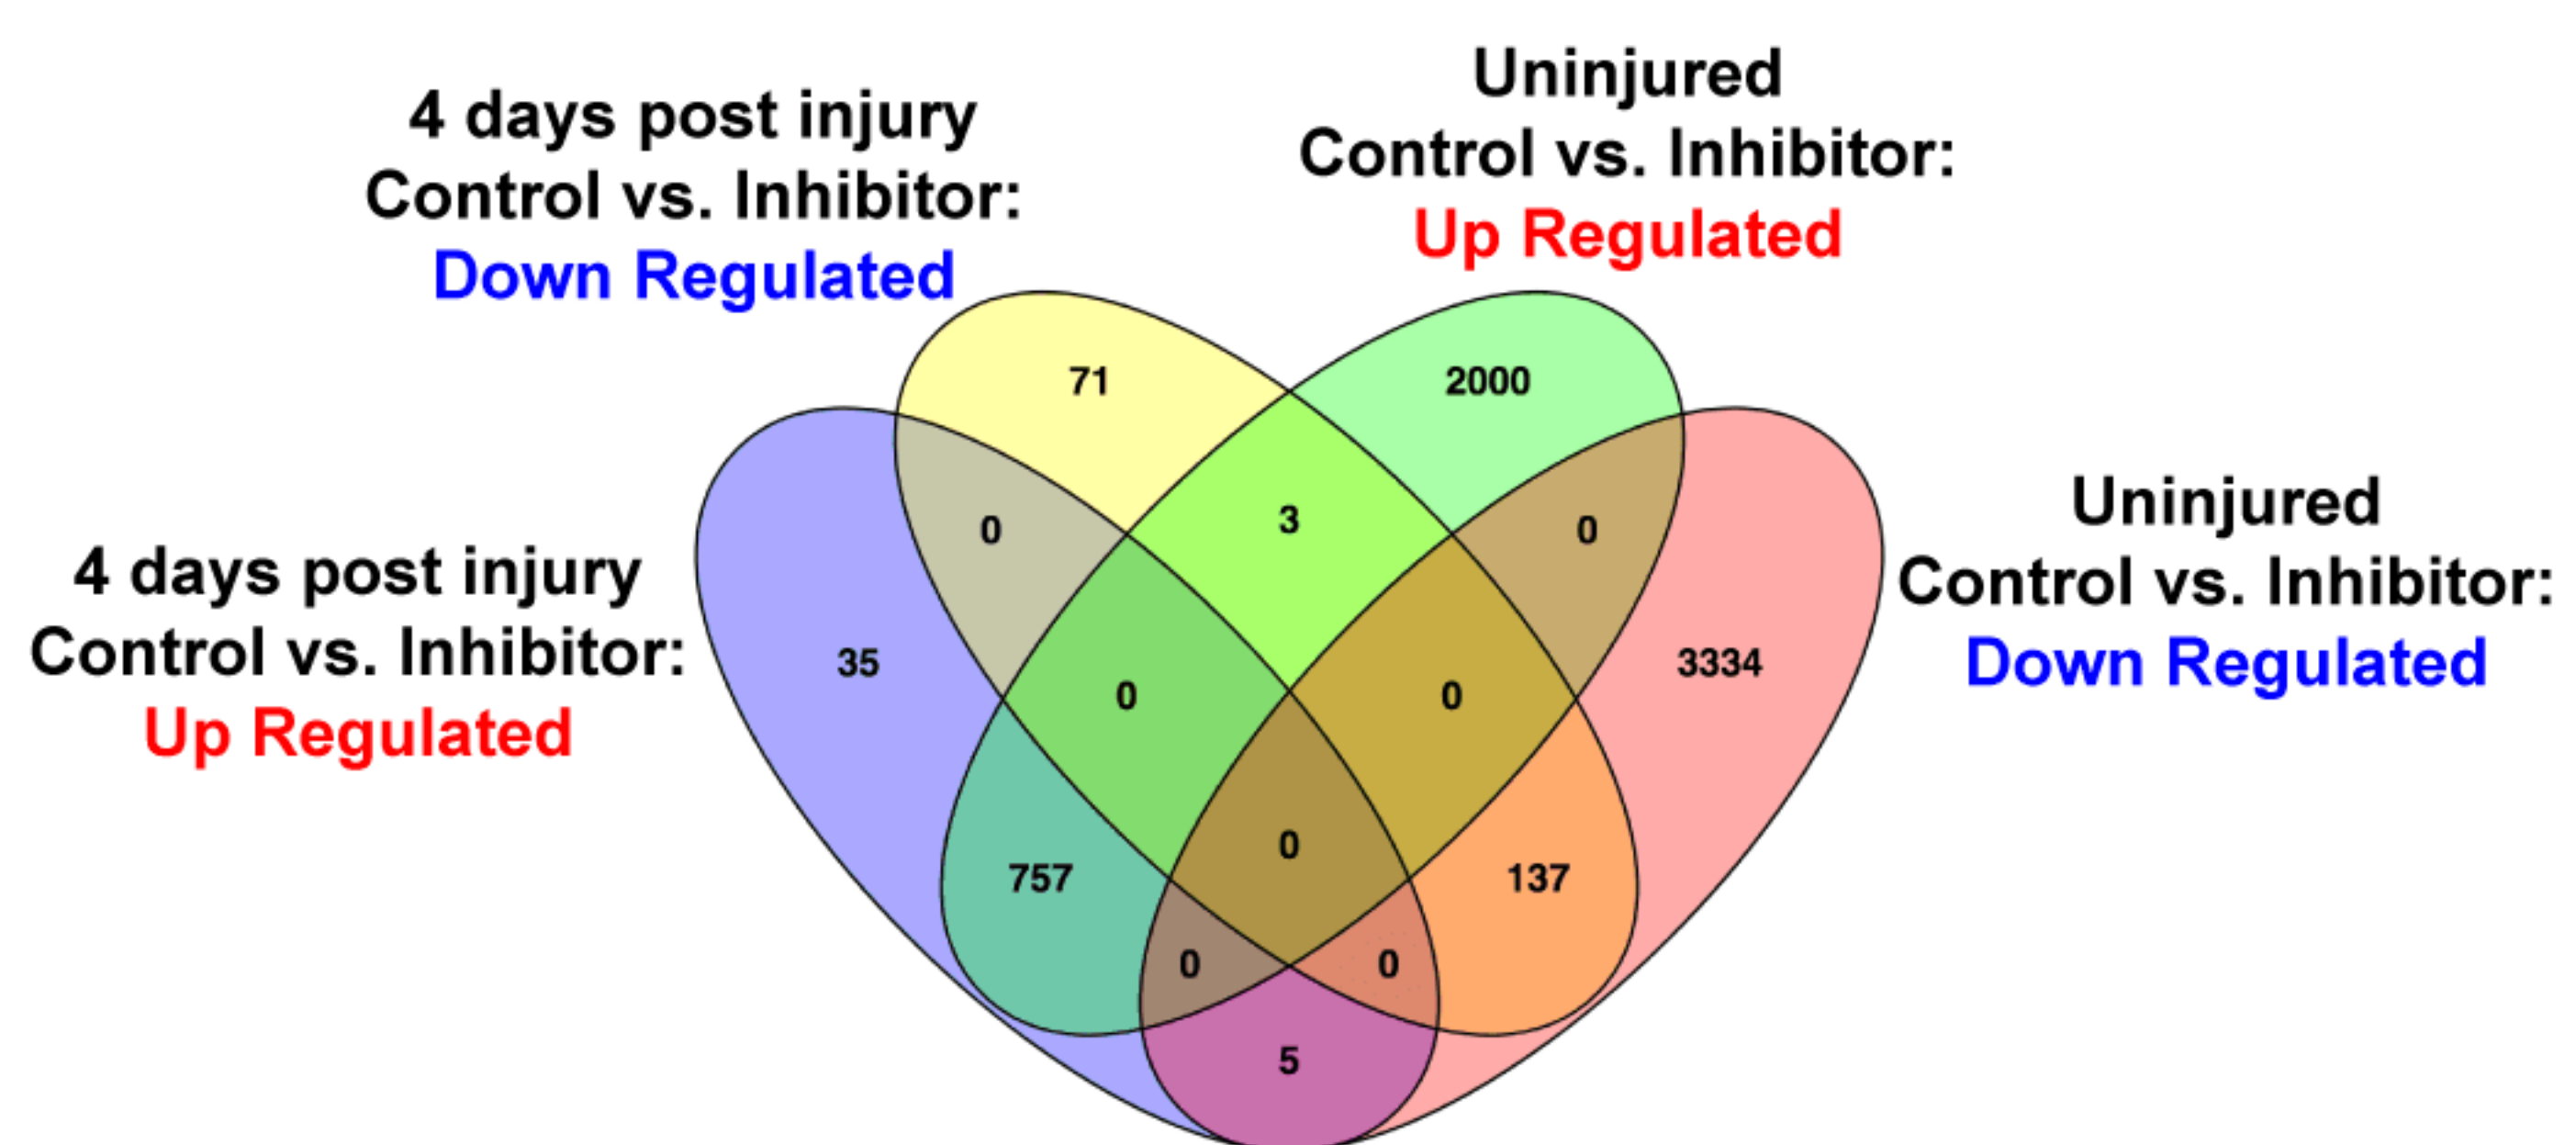

B.

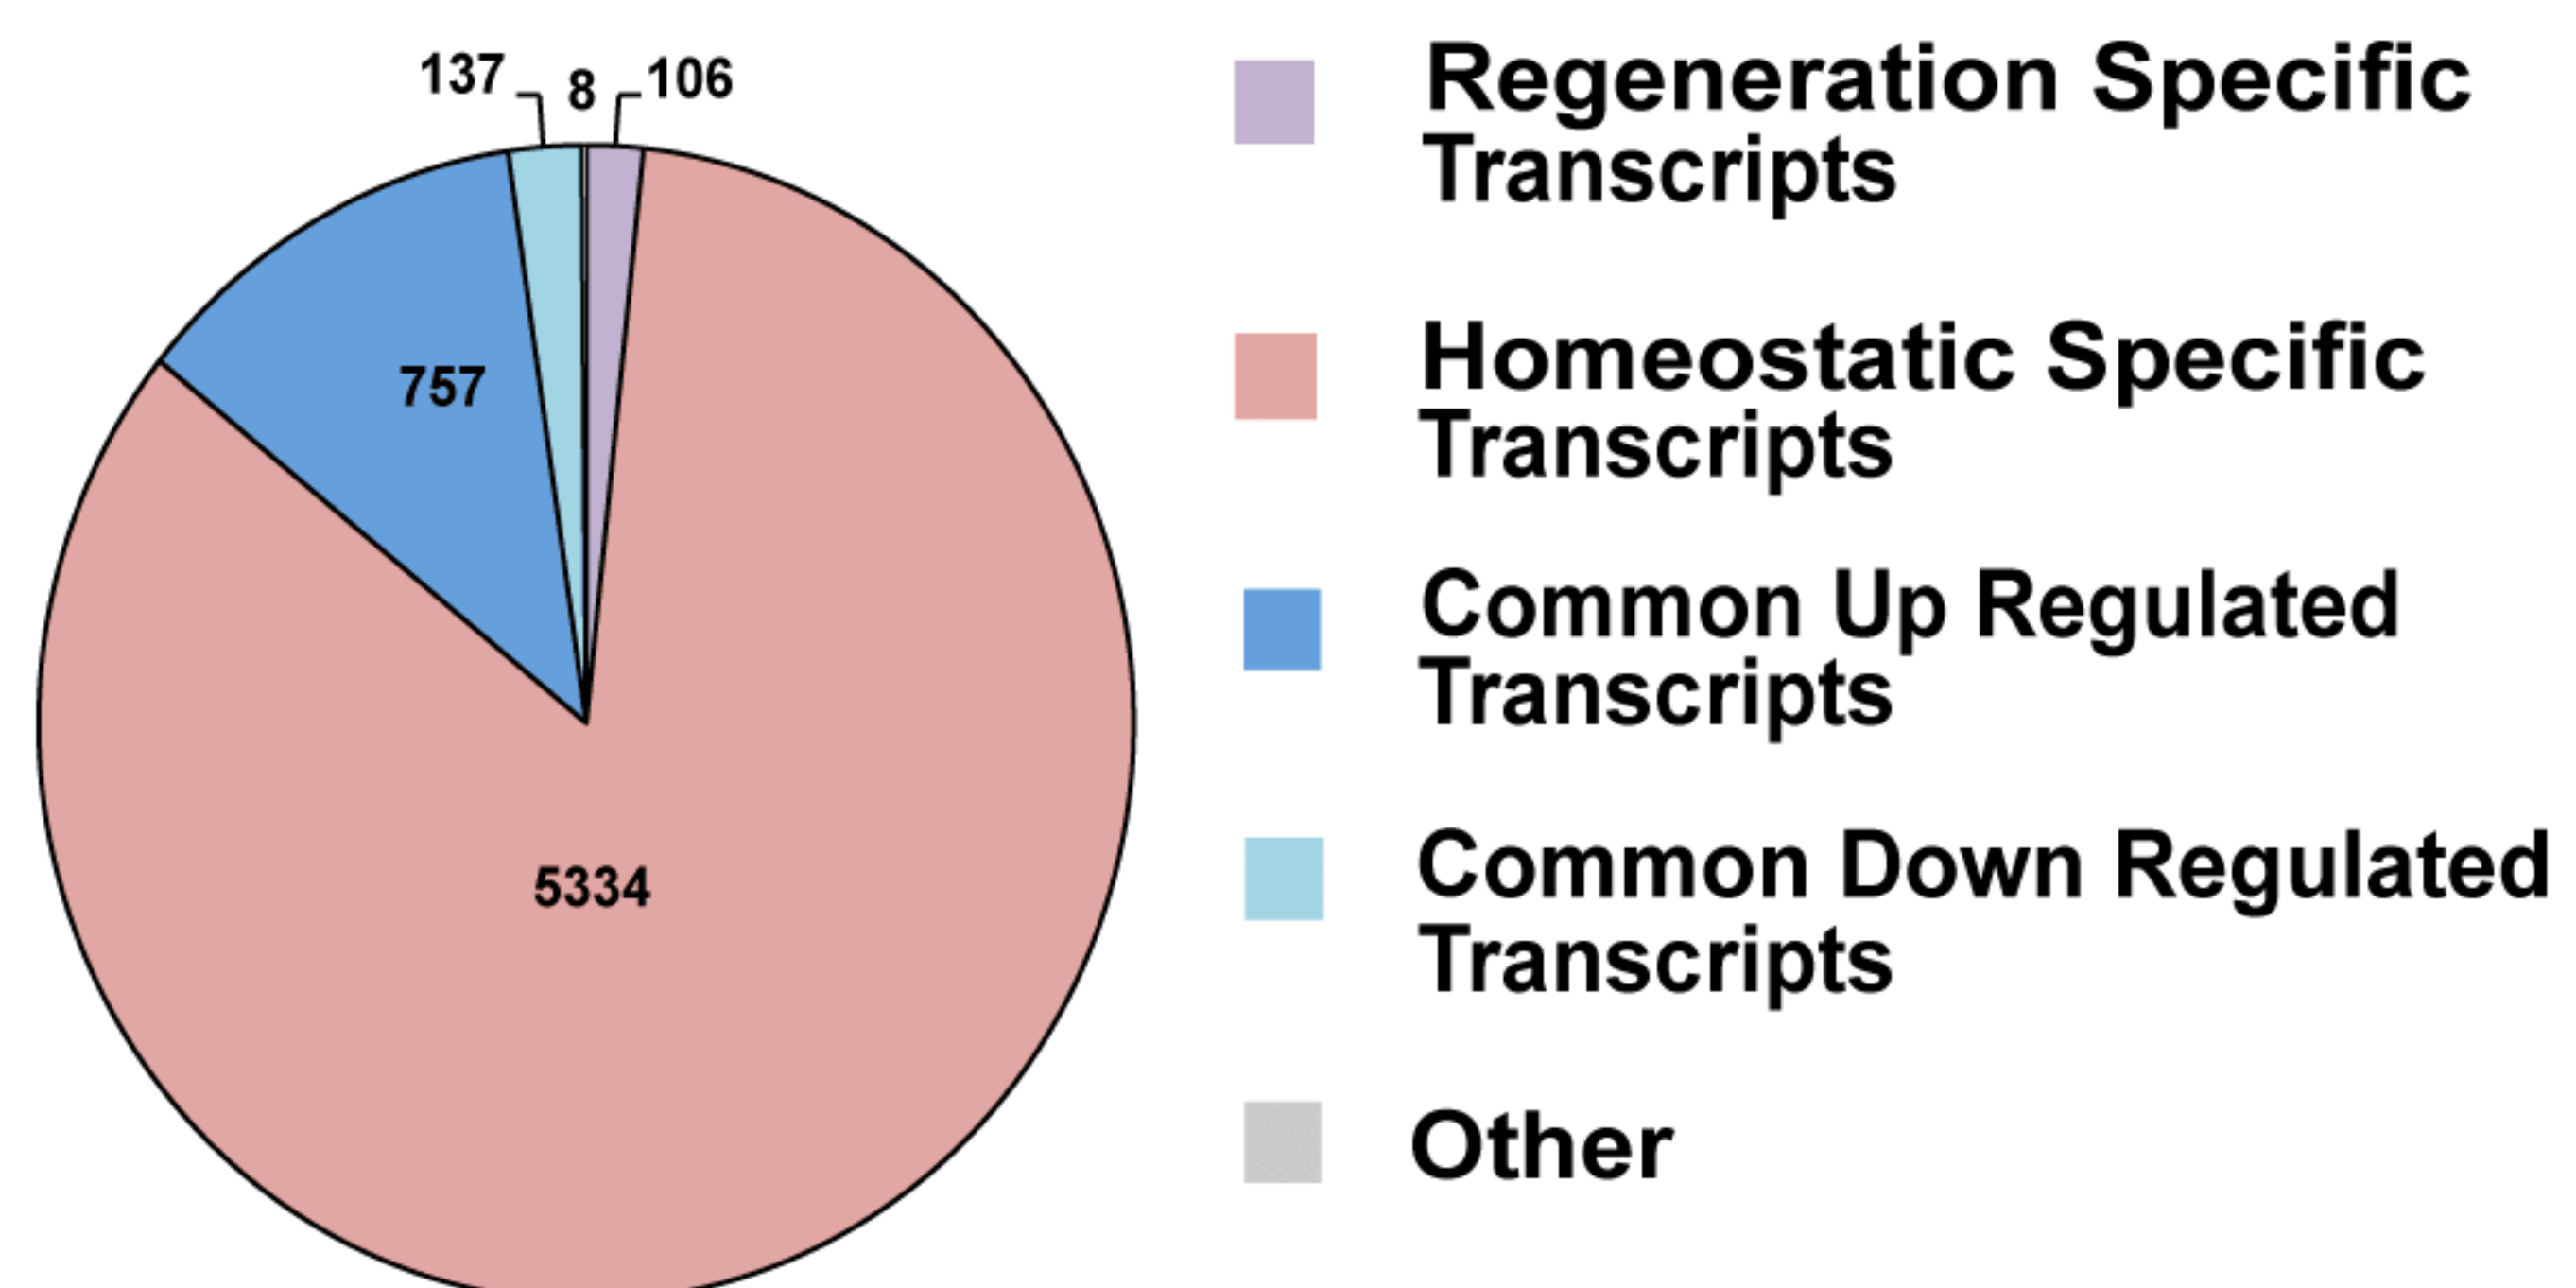

C.

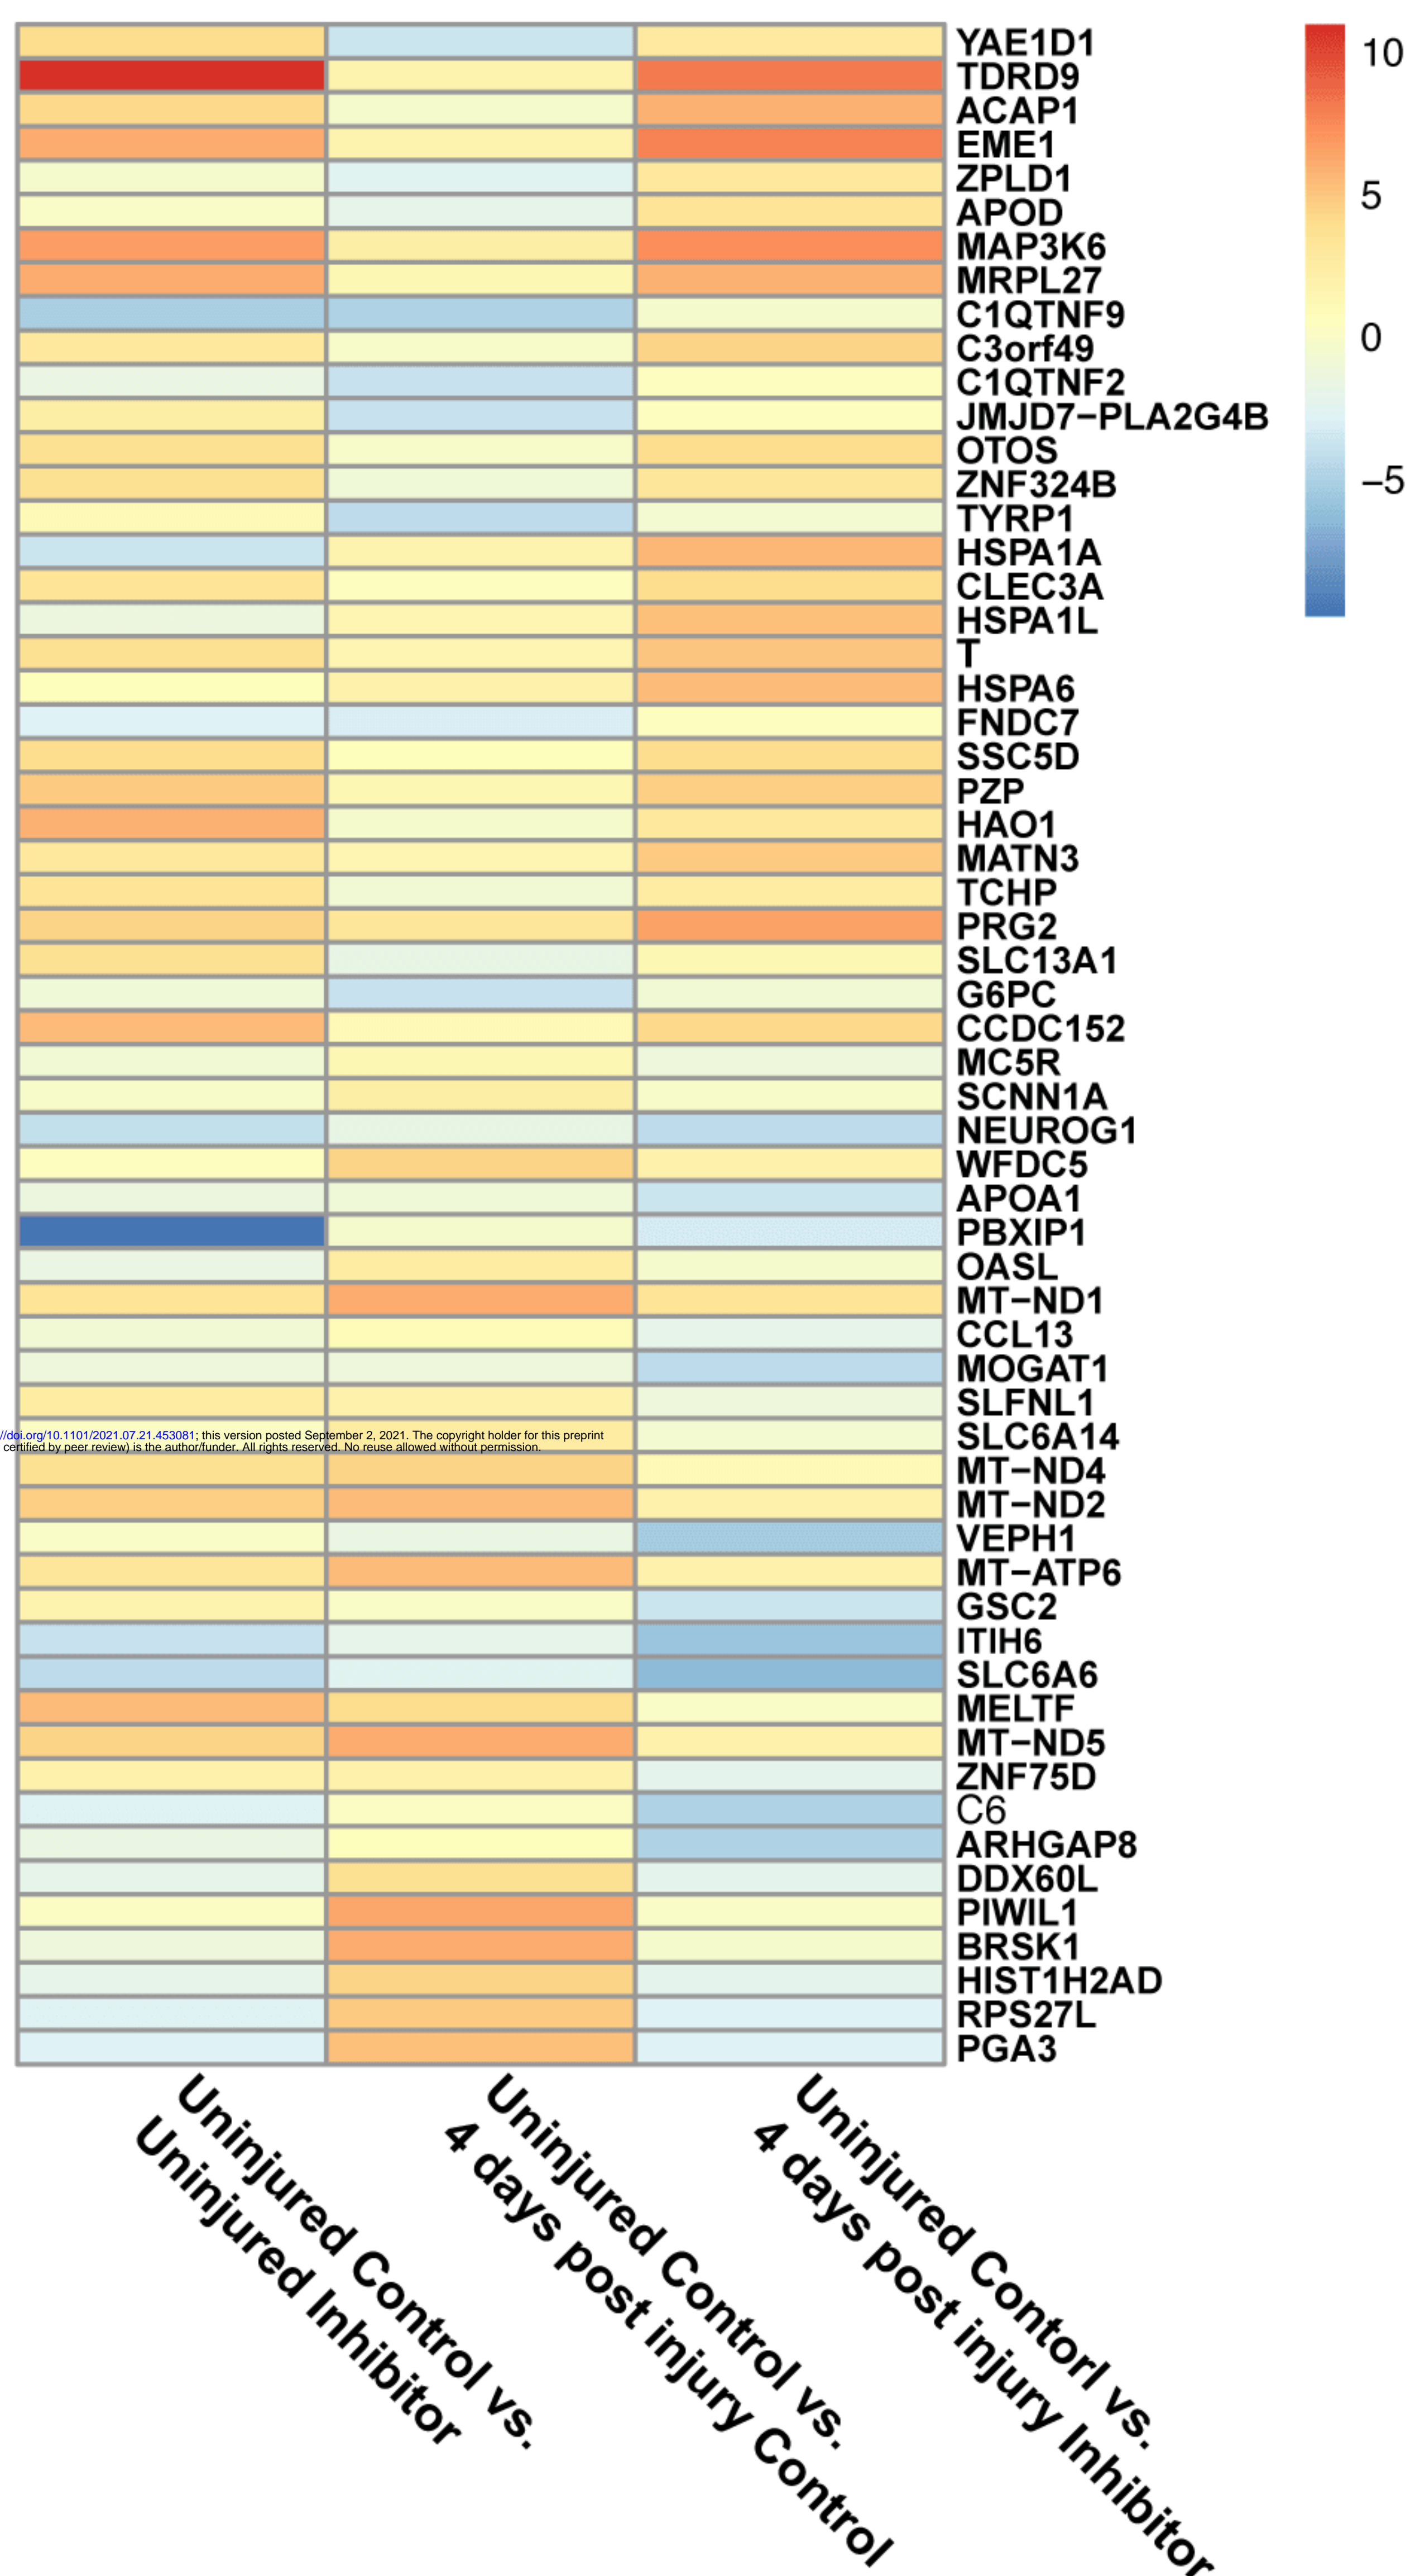

D.

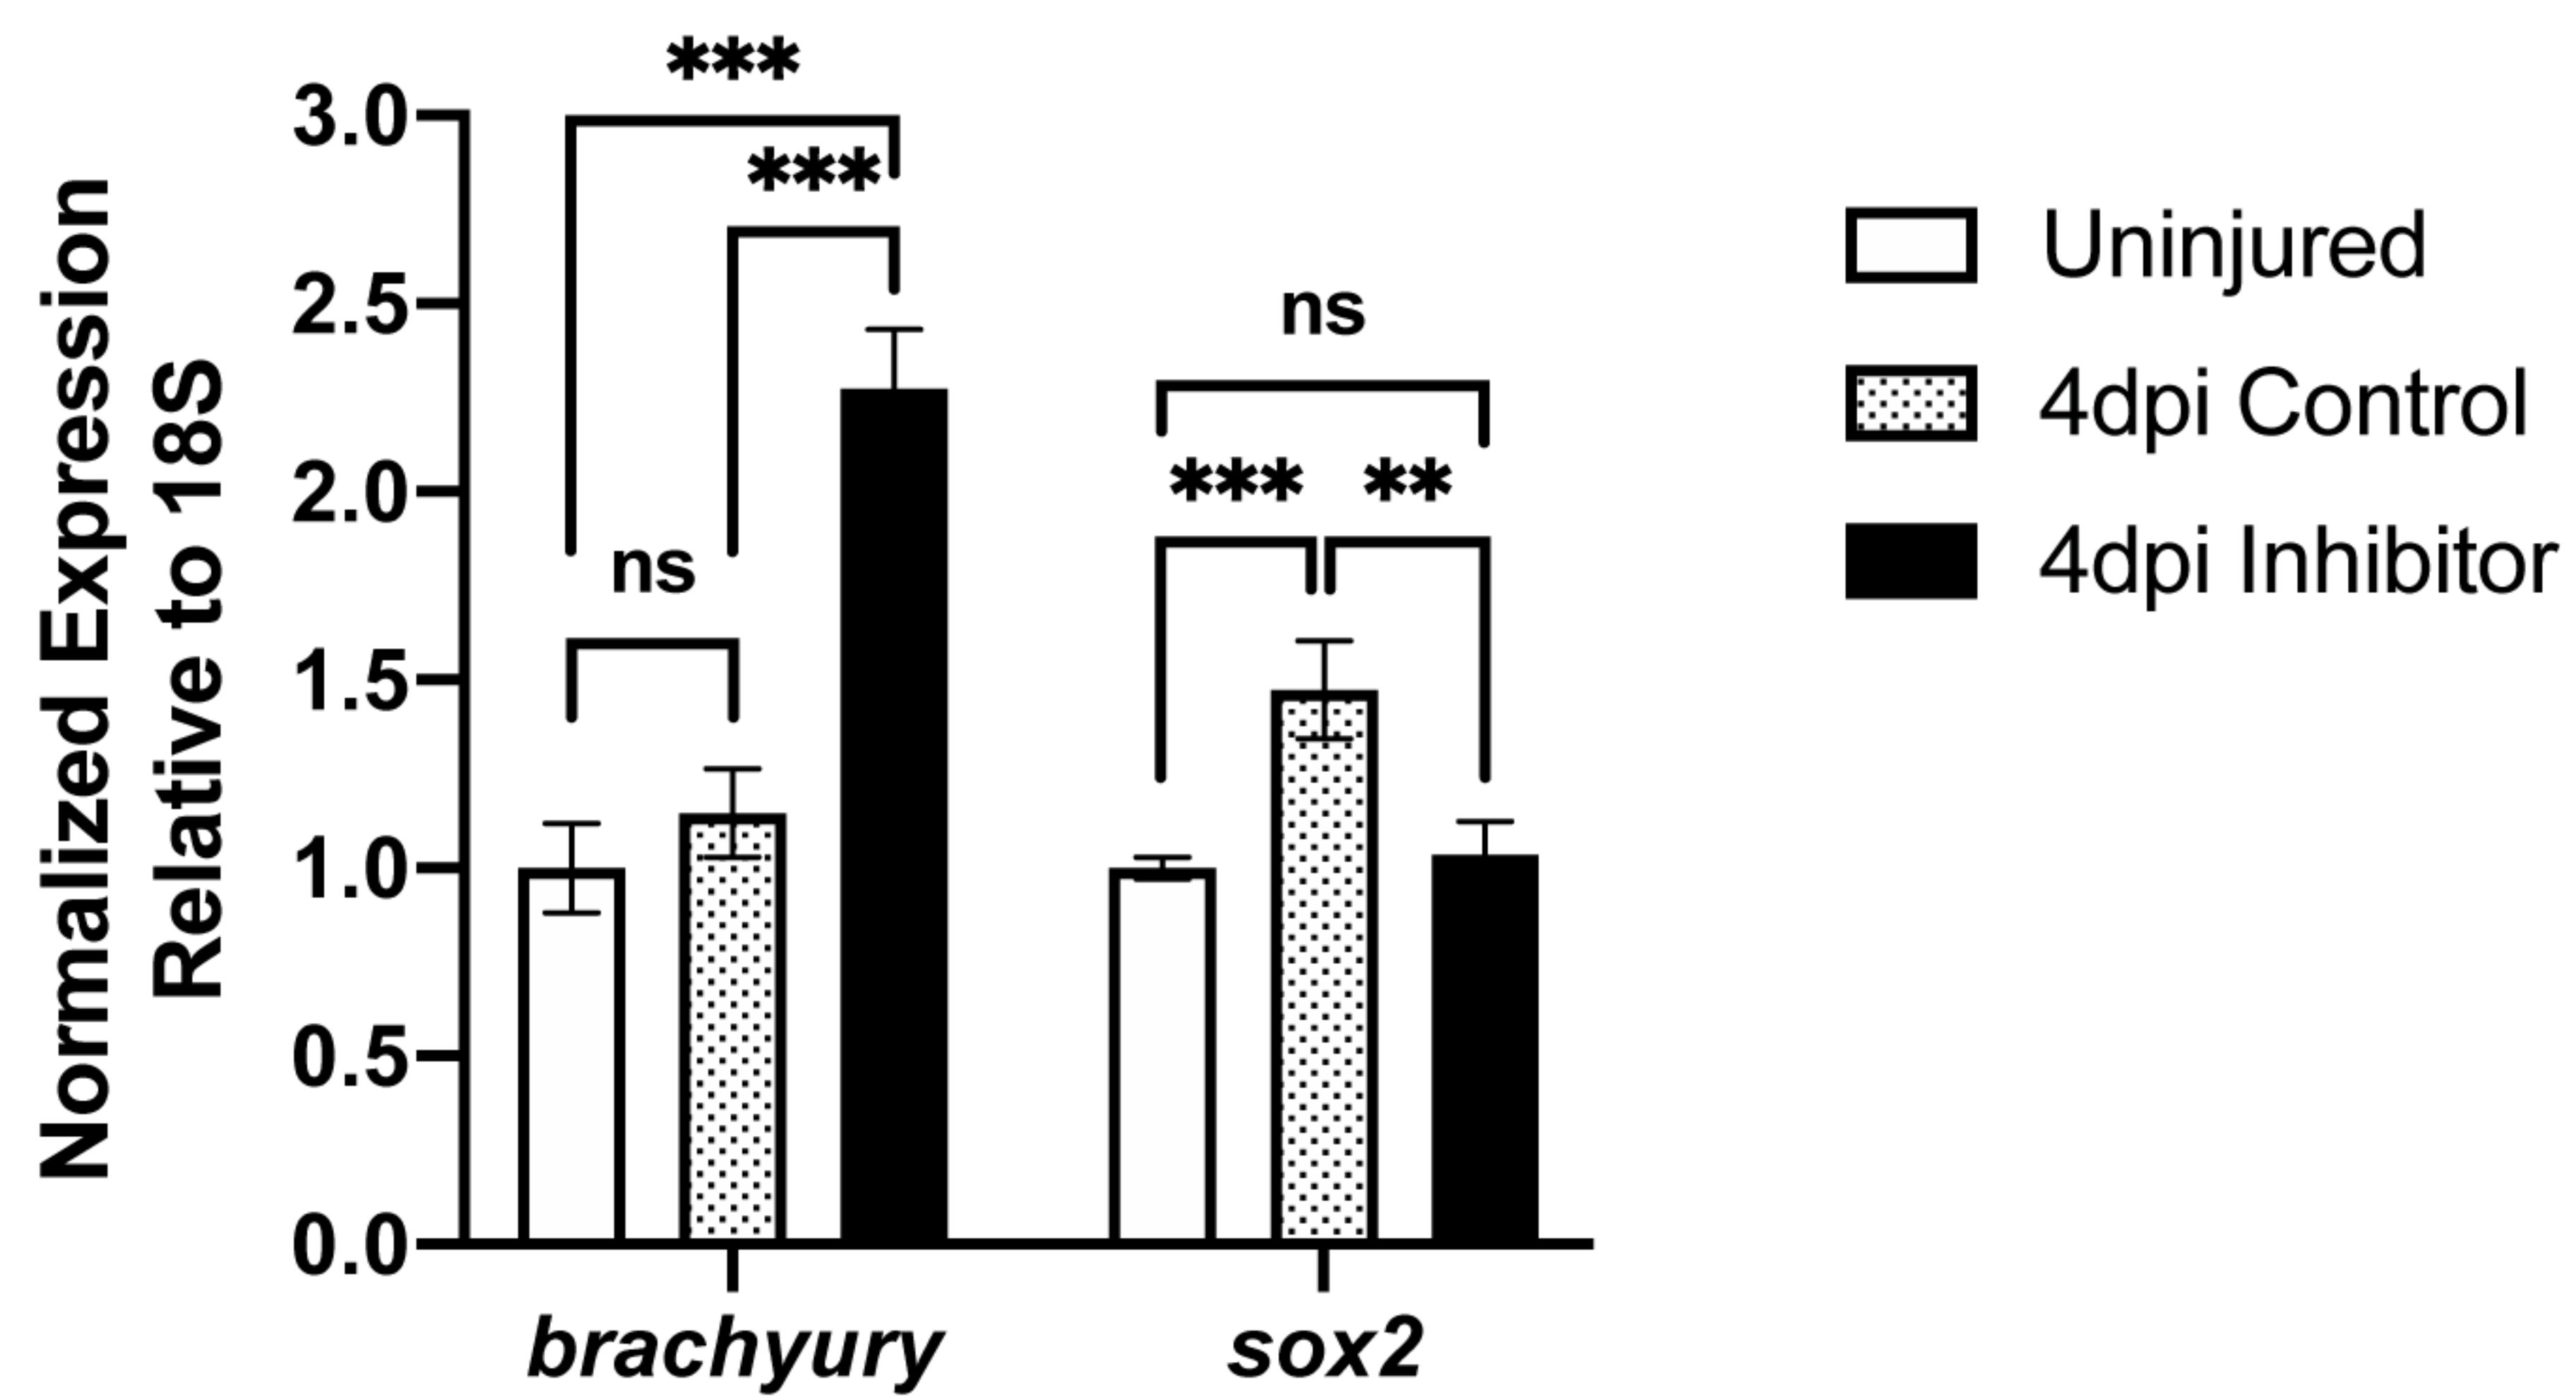

E.

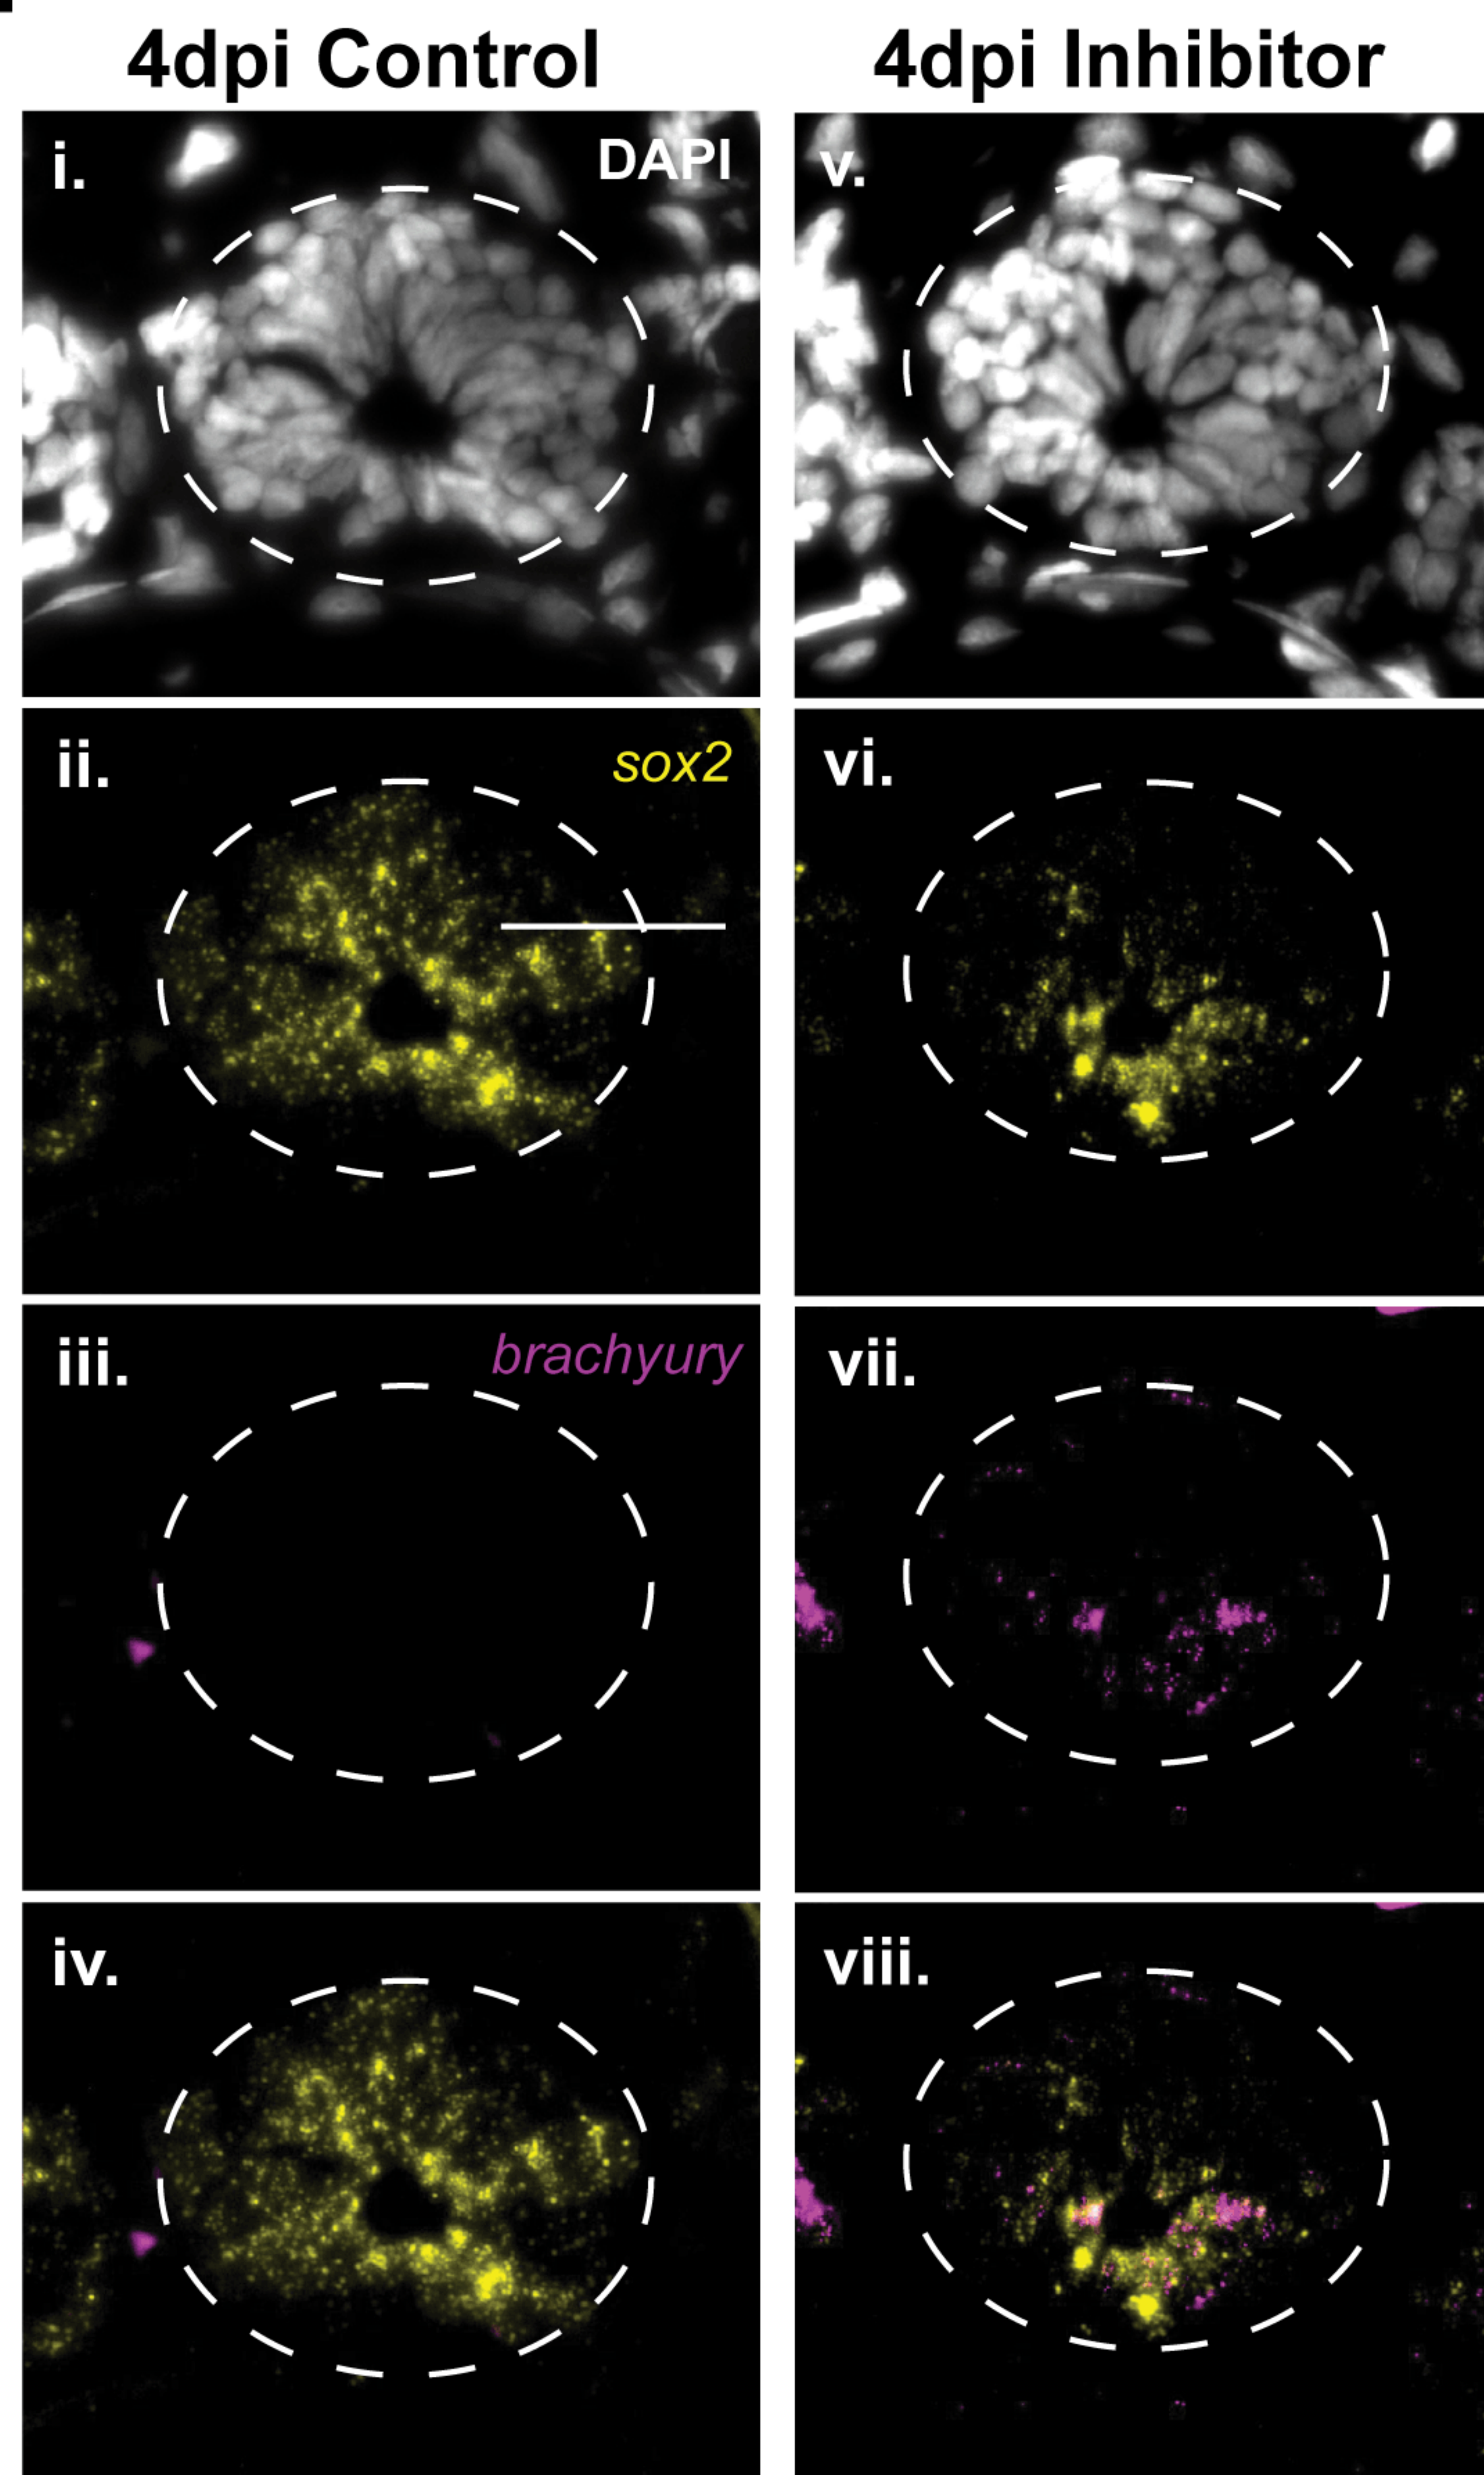

# Figure 2

**A.**

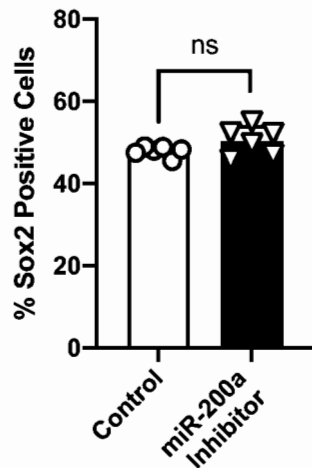

**B.**

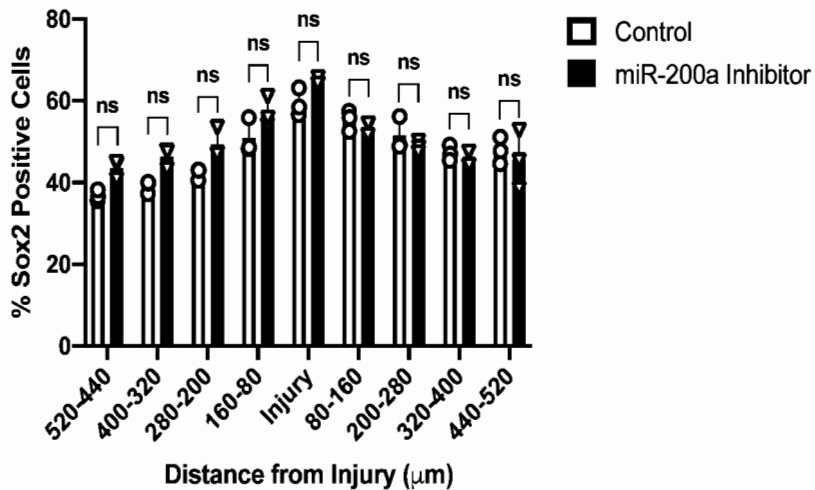

**C.**

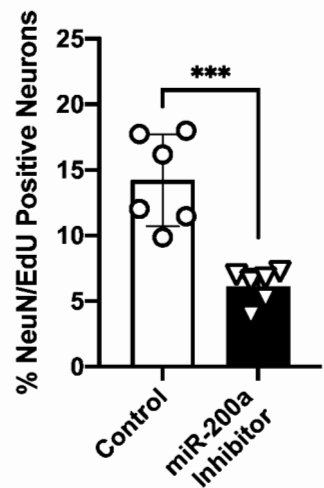

**D.**

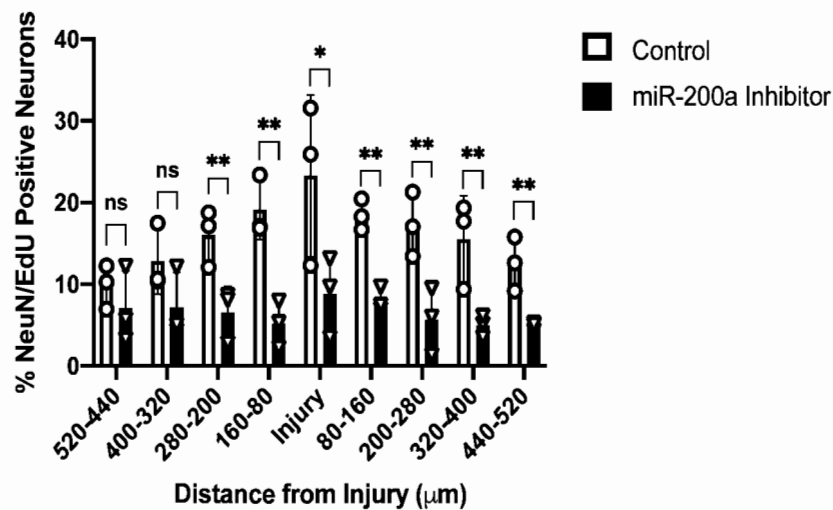

**Figure 3**

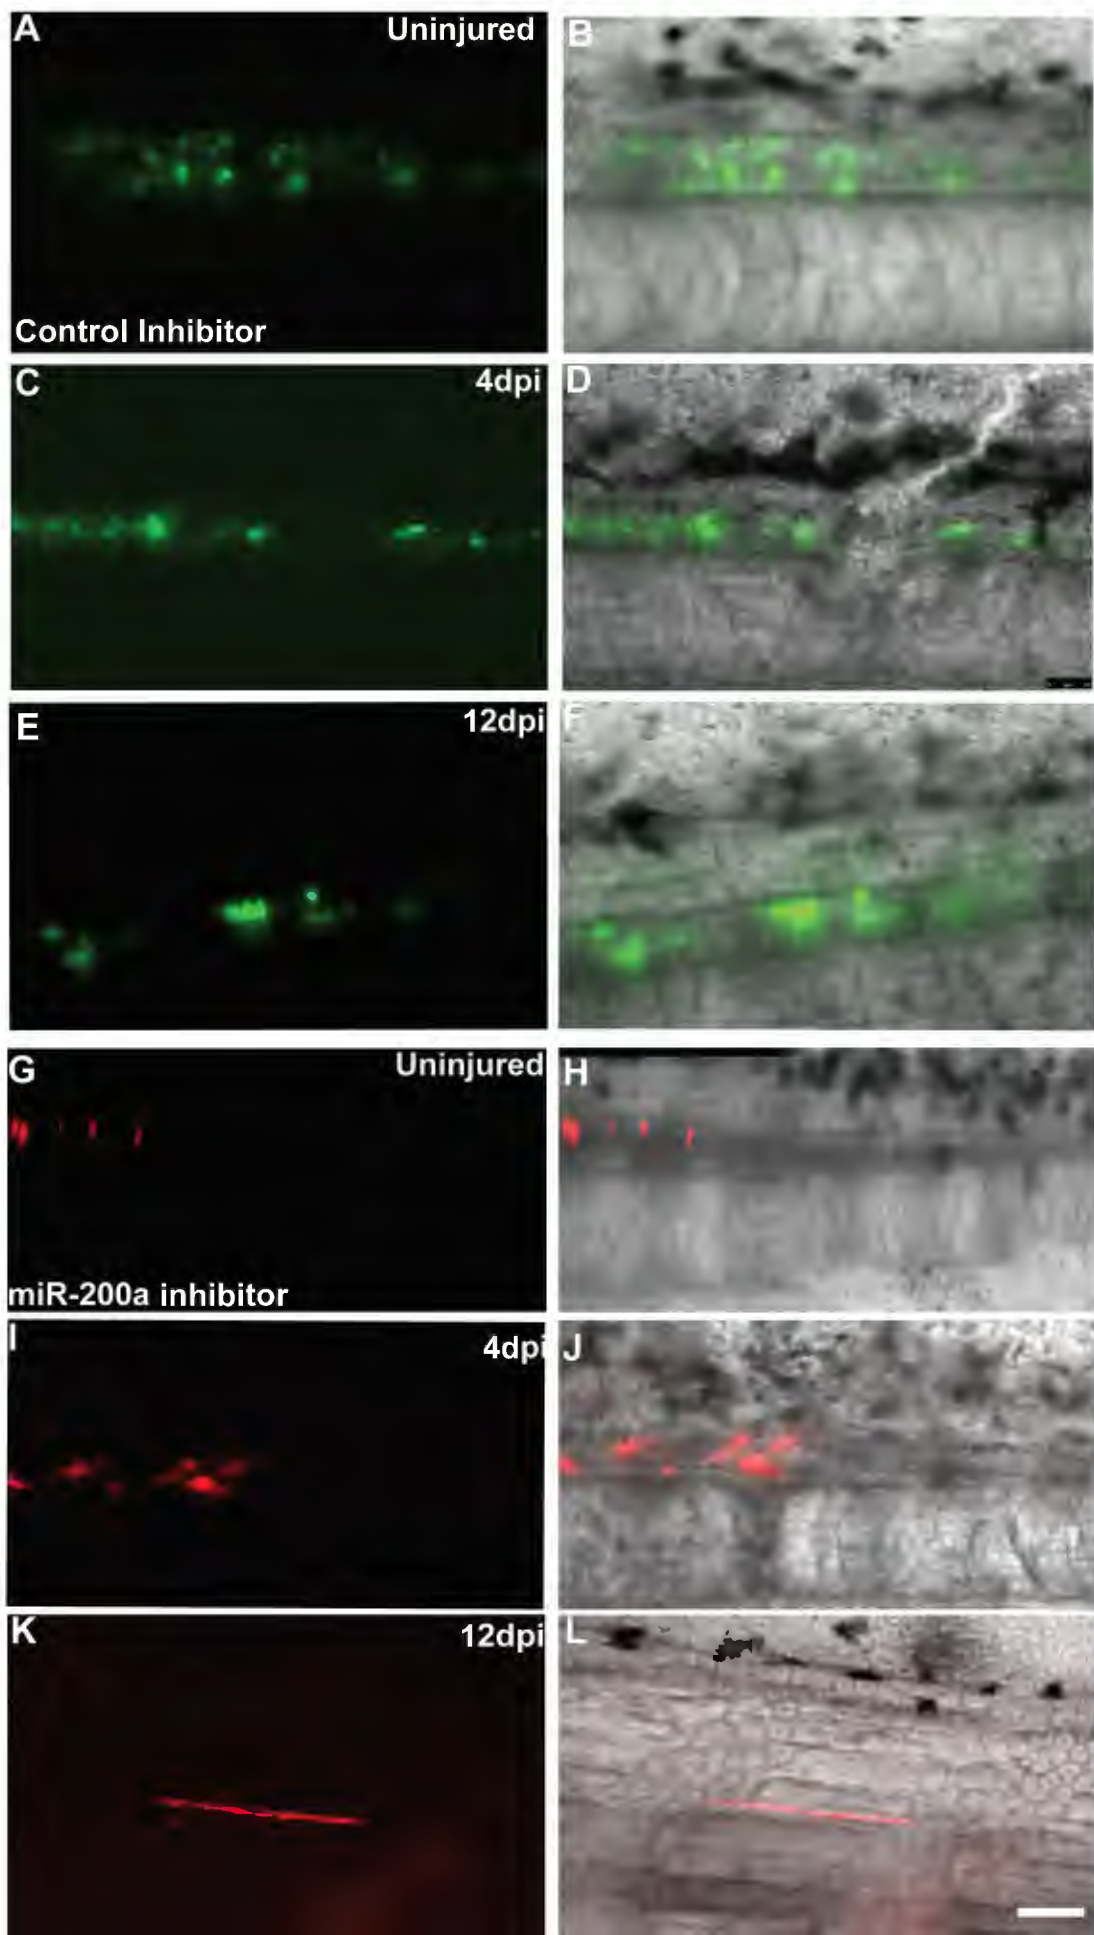



# Figure 4

bioRxiv preprint doi: <https://doi.org/10.1101/2021.07.21.453081>; this version posted September 2, 2021. The copyright holder for this preprint (which was not certified by peer review) is the author/funder. All rights reserved. No reuse allowed without permission.

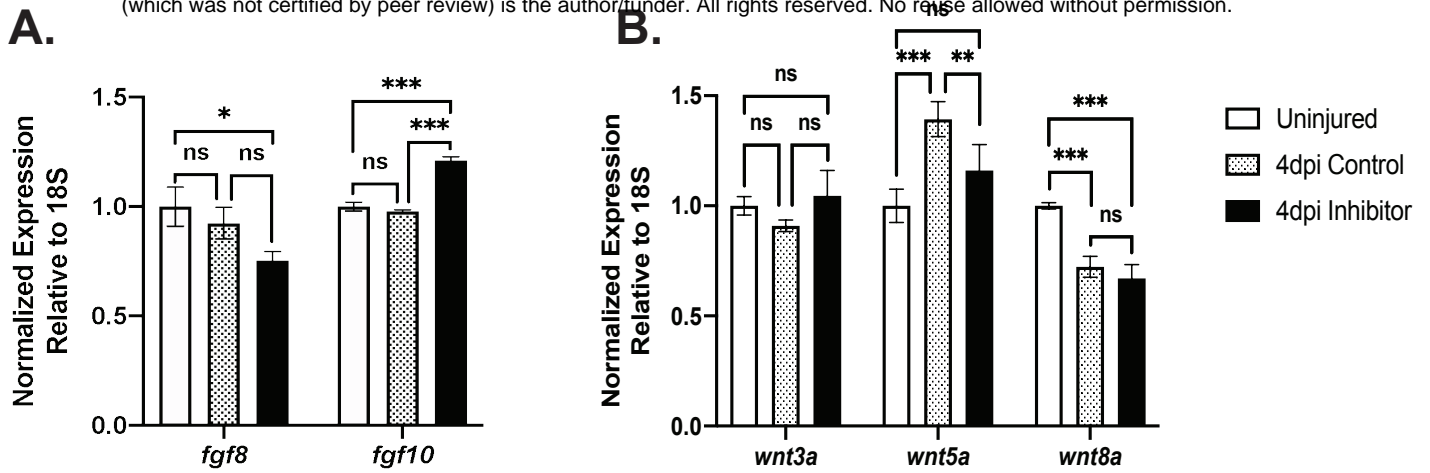

## C. 4dpi Control

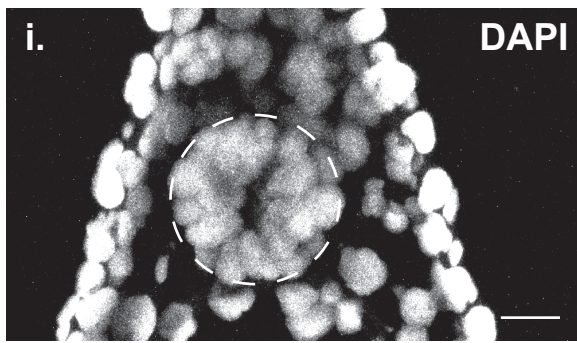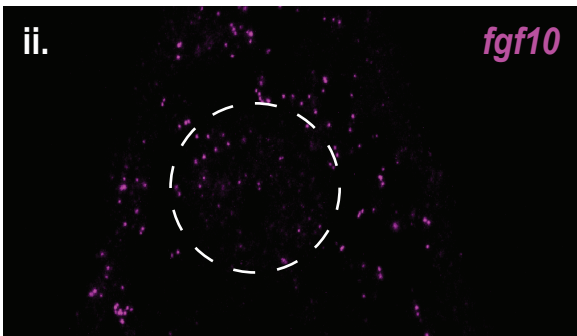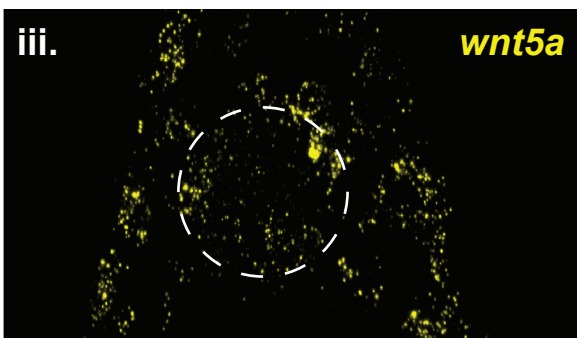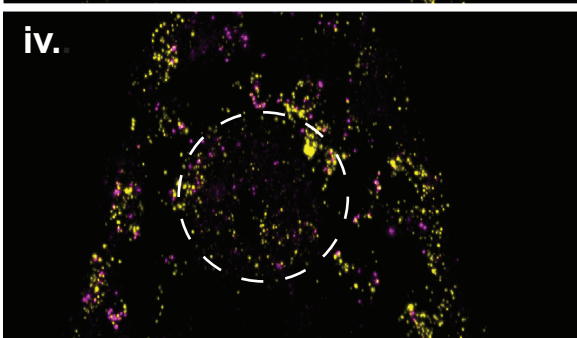

## D. 4dpi Inhibitor

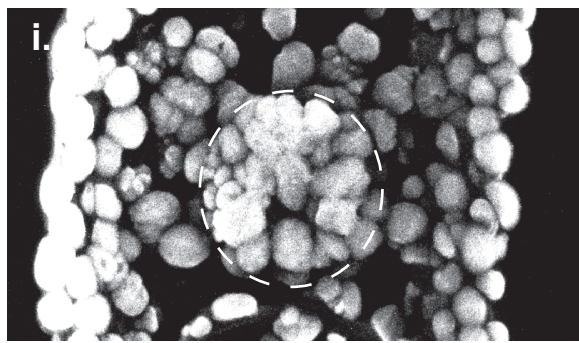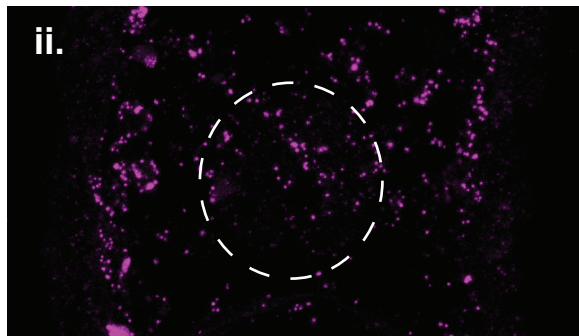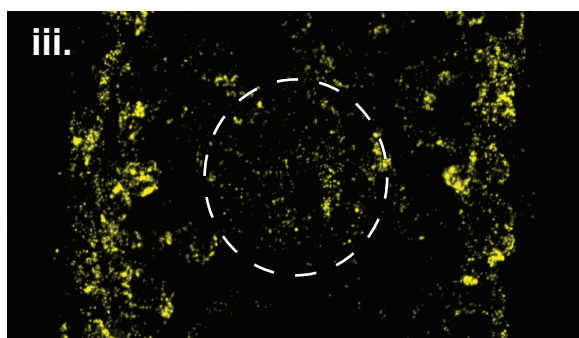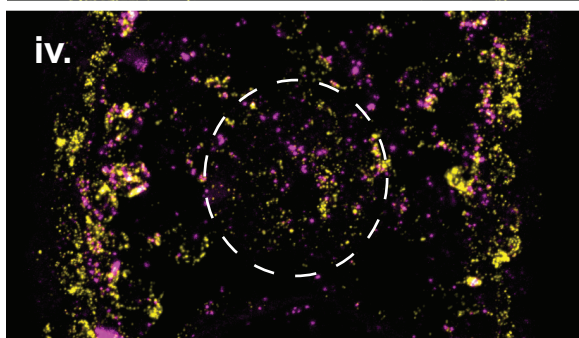

# Figure 5

bioRxiv preprint doi: <https://doi.org/10.1101/2021.07.21.453081>; this version posted September 2, 2021. The copyright holder for this preprint (which was not certified by peer review) is the author/funder. All rights reserved. No reuse allowed without permission.

## A. Uninjured

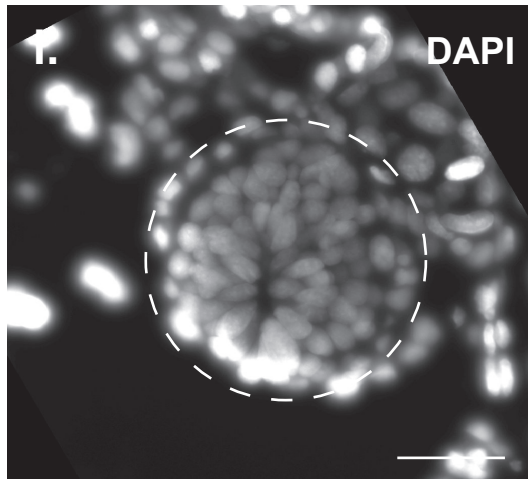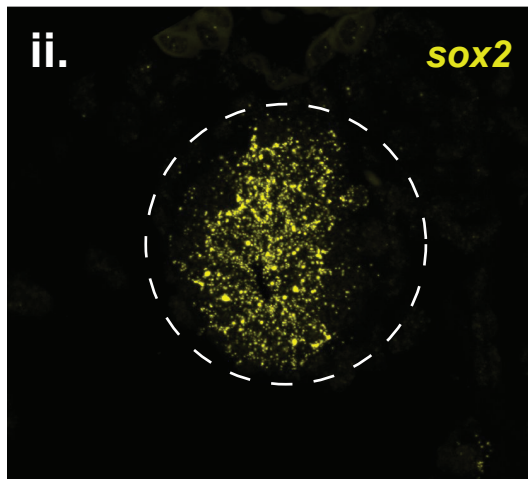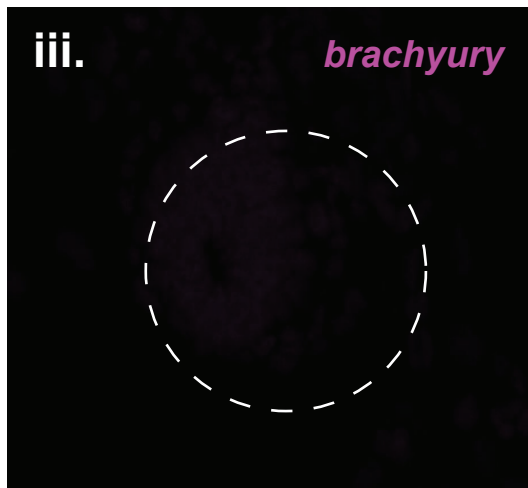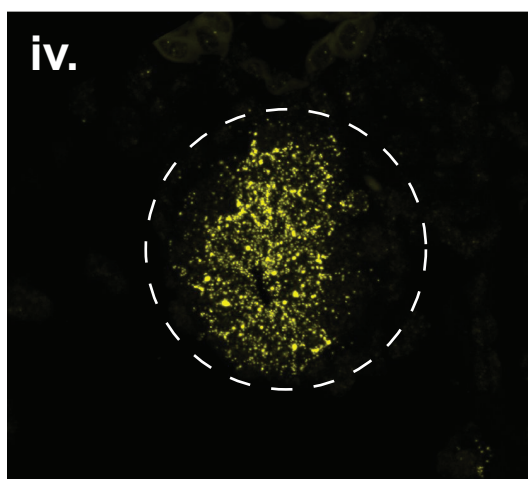

## B. 7dpa

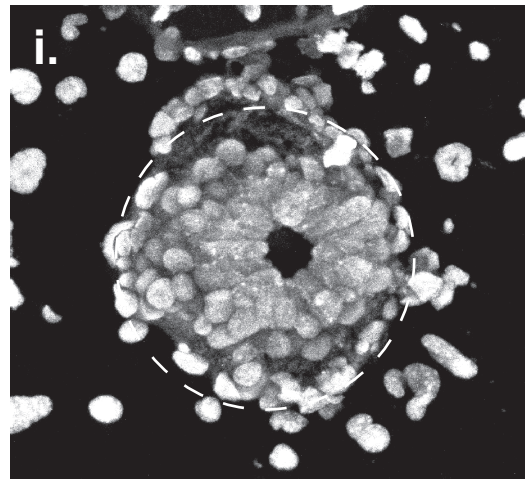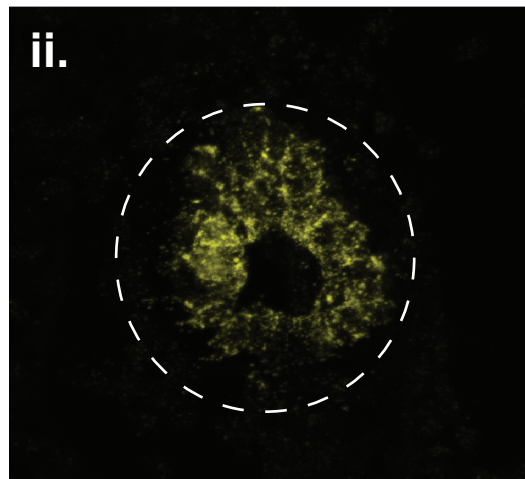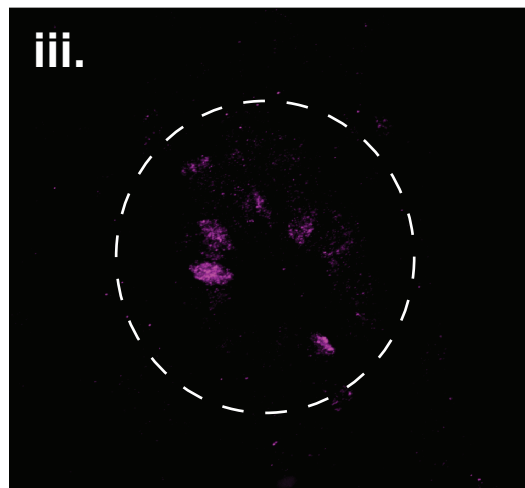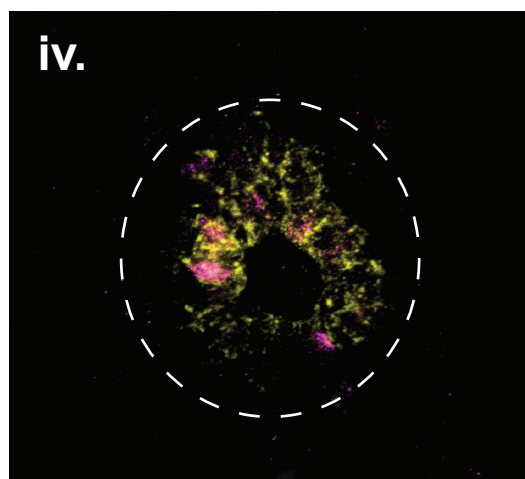

## Spinal cord injury

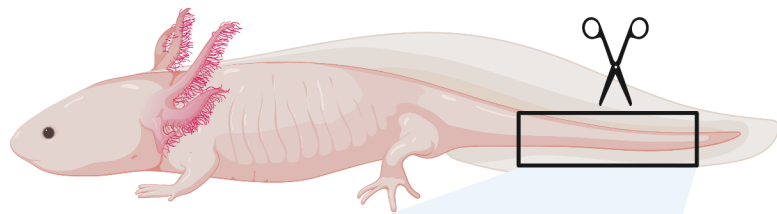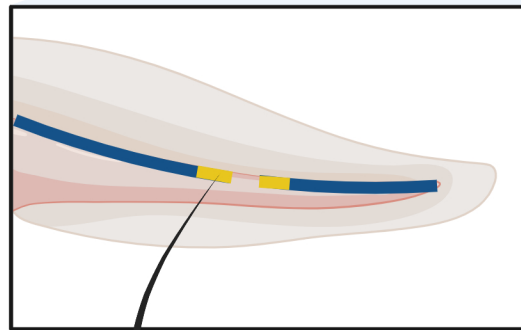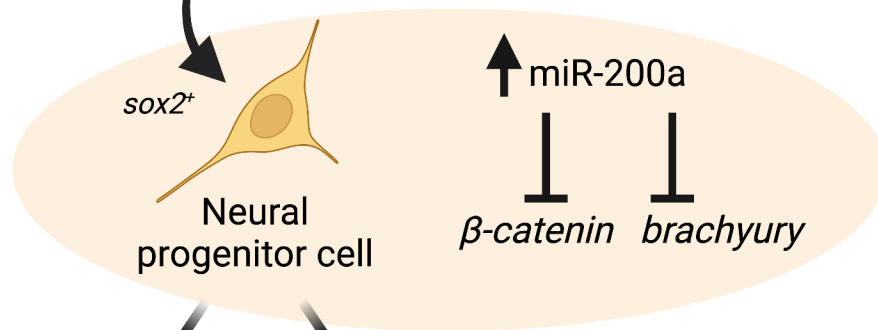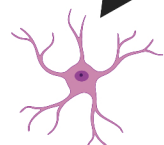

Glial cell

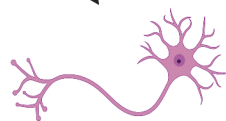

Neuron

## Spinal cord amputation

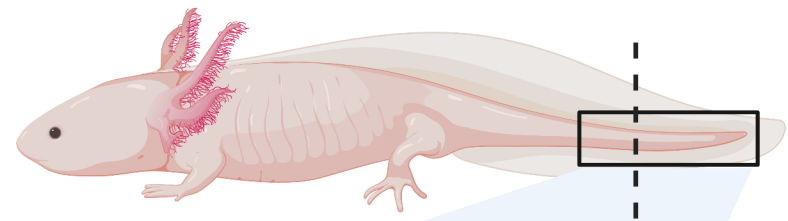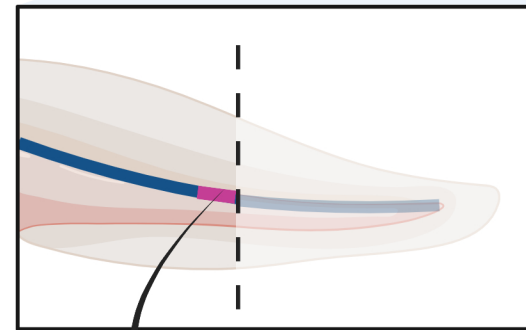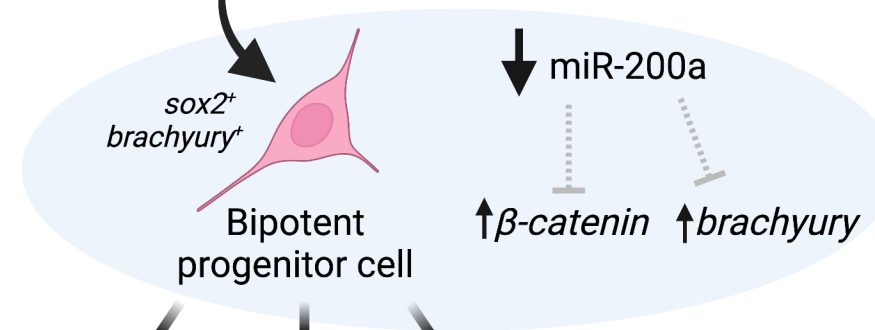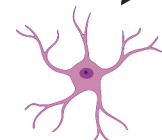

Glial cell

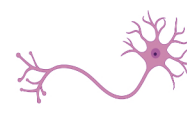

Neuron

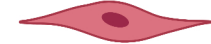

Muscle
